# Supplementary material for: Versatile three component procedure for combinatorial synthesis of biologically relevant scaffold spiro[indole-thiazolidinones] under aqueous conditions
Source: Royal Society of Chemistry journal article supplement (doi:10.1039/c0gc00863j), 2011-01-01

## Versatile Three Component Procedure for Combinatorial Synthesis of Biologically Relevant Scaffold Spiro[indole-thiazolidinones] under Aqueous Conditions.

Anshu Dandia<sup>\*a</sup>, Ruby Singh<sup>a</sup>, Sumit Bhaskaran<sup>a</sup> and Shriniwas D. Samant<sup>b</sup>

<sup>a</sup>*Department of Chemistry, University of Rajasthan, Jaipur 302 004, India*

<sup>b</sup>*Institute of Chemical Technology, Mumbai - 400 019, India*

e-mail: [dranshudandia@yahoo.co.in](mailto:dranshudandia@yahoo.co.in)

### Supporting Information

**Experimental:** Melting points were determined on a Toshniwal apparatus. The purity of compounds was checked on thin layers of silica gel in various non-aqueous solvent systems, for e.g. benzene: ethylacetate (9:1), benzene: dichloromethane (8:2). IR spectra (KBr) were recorded on a Magna FT IR–550 spectrophotometer and <sup>1</sup>H NMR and <sup>13</sup>C NMR spectra were recorded on Bruker DRX-300 using CDCl<sub>3</sub> at 300.13 and 75.47, respectively. TMS was used as internal reference. DART Mass spectra of representative compounds were recorded on YOKUDELNA\_ES+\_2000 spectrometer and EIMS were recorded on Kratos Mass spectrometer. The ultrasound-assisted reactions were carried out in and ultrasonic bath (Bandelin Sonorex) operating at 230 V generating 33 KHz output frequency. The location at which the intensity of ultrasound is maximum checked by Weissler reaction. HIU irradiation was provided by the ultrasonic processor probe system (Processor SONOPROS PR-1000MP, OSCAR ULTRASONICS made) operating at 20 KHz, 750W with 6mm/12 mm tip diameter probes. The synthesized compounds were compared with the authentic samples, prepared by the conventional method.

**Typical procedure for preparation of 3'-(2,3-dihydro-1,5-dimethyl-3-oxo-2-phenyl-1H-pyrazol-4-yl)-5'-methyl-spiro[3H-indole-3,2'-thiazolidine]-2,4'(1H)-dione (4a) under HIU irradiation using sonicator:**

A mixture of indole-2, 3-dione (3 mmol), 4-aminoantipyrine (3 mmol) and 2-mercaptopropionic acid (3.5 mmol) and cetyltrimethylammonium bromide (20 mol%) in water (10ml) were taken in a flask. The flask was attached to a 12 mm tip diameter probe and the reaction mixture was sonicated for the specified period at 50% power of the processor at 4 s pulse mode. At the end of the reaction period, TLC was checked and the flask was detached from the probe and the content was transferred into a beaker. The formed precipitated product was flittered and washed with water and ethanol to afford the pure white crystalline product (**4a**).

Fig.-1 <sup>1</sup>H NMR of 4a

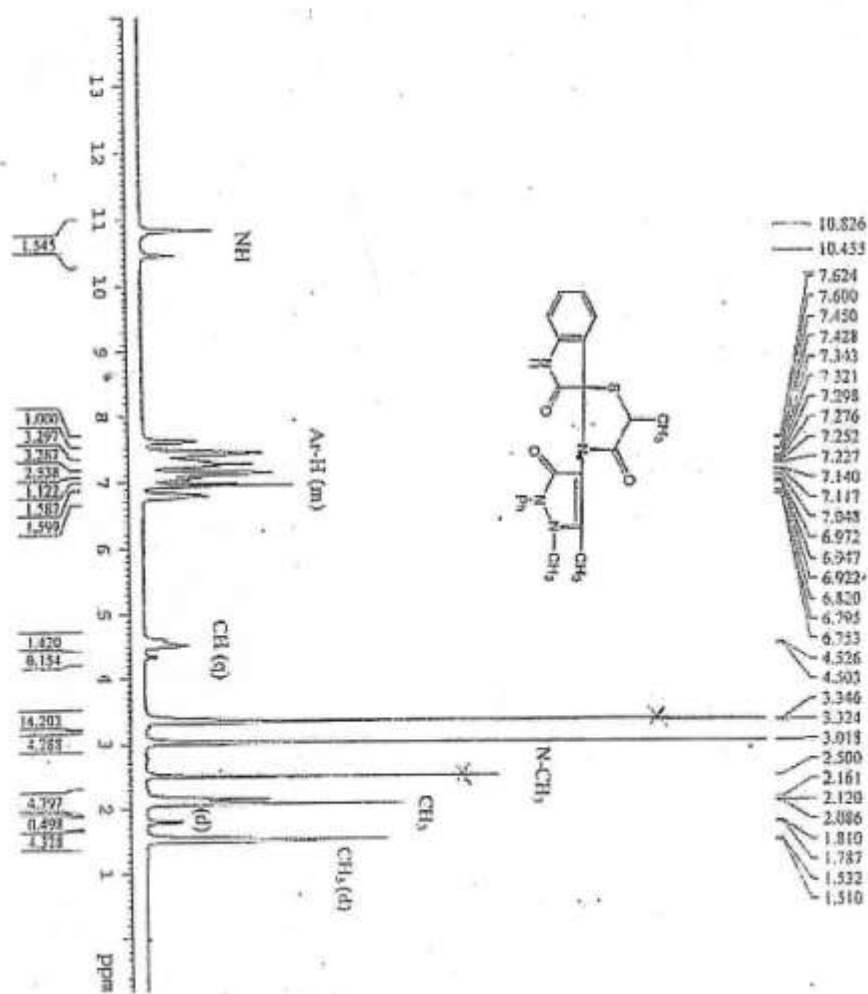

Current Data Parameters  
NAME 4361\_4mp2  
EXPNO 1  
PROCNO 1

F2 - Acquisition Parameters  
Date\_ 30071810  
Time 16.12  
INSTRUM spect  
PROBHD 5 mm BBOHNP1  
PULPROG zgpg30  
TD 65536  
SOLVENT DMSO  
NS 2  
DS 2  
SWH 9578.544 Hz  
FIDRES 0.170437 Hz  
AQ 1.4710297 sec  
RG 327.165  
DQF 5.00  
LH 5.00 sec  
TE 0.0 K  
U1 1.0000000 sec  
MAGRES 0.0000000 sec  
SFCVPR 3.0150000 sec

NAME CHANNEL F1  
NUC1 1H  
P1 6.30 usec  
PL1 -2.00 dB  
SFO1 300.1314057 MHz

F2 - Processing parameters  
SI 32768  
SF 300.13098 MHz  
WDW EM  
SSB 0  
LB 0.130 Hz  
GB 0  
PC 1.00

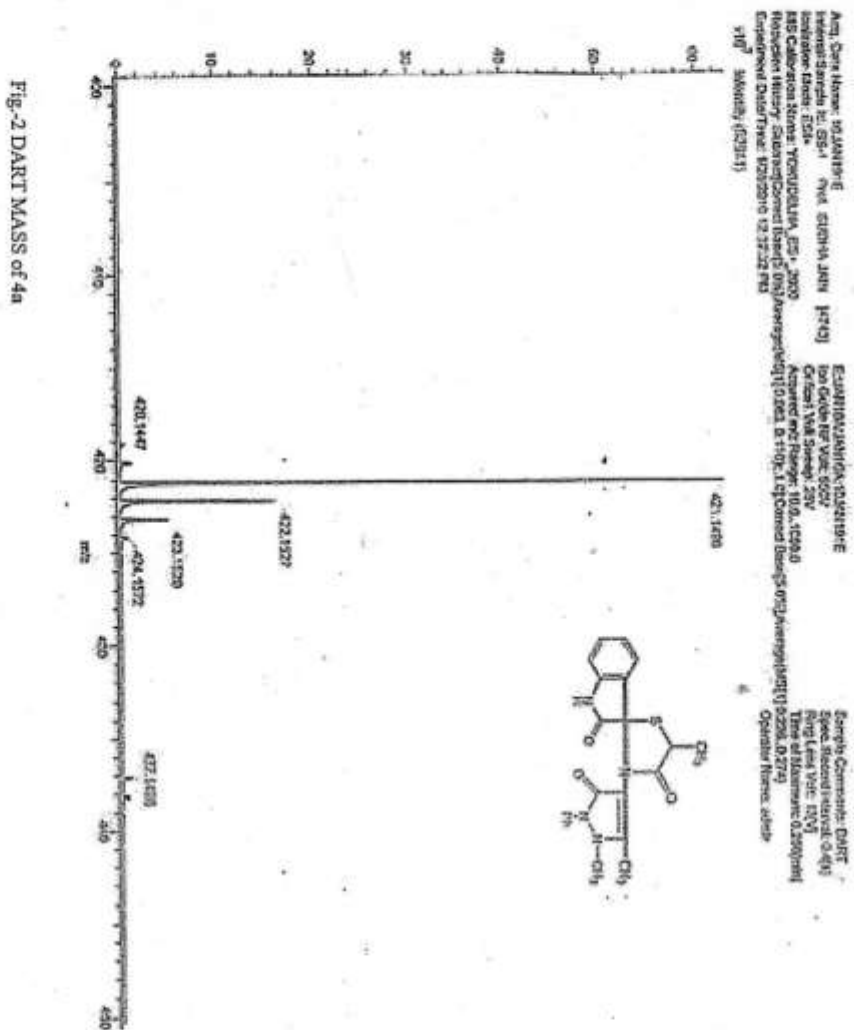

CN1C(=O)N(C)C(=O)N1C2C(=O)N(C)C(=O)N2C3C(=O)N(C)C(=O)N3C4C(=O)N(C)C(=O)N4C5C(=O)N(C)C(=O)N5C6C(=O)N(C)C(=O)N6C7C(=O)N(C)C(=O)N7C8C(=O)N(C)C(=O)N8C9C(=O)N(C)C(=O)N9C10C(=O)N(C)C(=O)N10C11C(=O)N(C)C(=O)N11C12C(=O)N(C)C(=O)N12C13C(=O)N(C)C(=O)N13C14C(=O)N(C)C(=O)N14C15C(=O)N(C)C(=O)N15C16C(=O)N(C)C(=O)N16C17C(=O)N(C)C(=O)N17C18C(=O)N(C)C(=O)N18C19C(=O)N(C)C(=O)N19C20C(=O)N(C)C(=O)N20C21C(=O)N(C)C(=O)N21C22C(=O)N(C)C(=O)N22C23C(=O)N(C)C(=O)N23C24C(=O)N(C)C(=O)N24C25C(=O)N(C)C(=O)N25C26C(=O)N(C)C(=O)N26C27C(=O)N(C)C(=O)N27C28C(=O)N(C)C(=O)N28C29C(=O)N(C)C(=O)N29C30C(=O)N(C)C(=O)N30C31C(=O)N(C)C(=O)N31C32C(=O)N(C)C(=O)N32C33C(=O)N(C)C(=O)N33C34C(=O)N(C)C(=O)N34C35C(=O)N(C)C(=O)N35C36C(=O)N(C)C(=O)N36C37C(=O)N(C)C(=O)N37C38C(=O)N(C)C(=O)N38C39C(=O)N(C)C(=O)N39C40C(=O)N(C)C(=O)N40C41C(=O)N(C)C(=O)N41C42C(=O)N(C)C(=O)N42C43C(=O)N(C)C(=O)N43C44C(=O)N(C)C(=O)N44C45C(=O)N(C)C(=O)N45C46C(=O)N(C)C(=O)N46C47C(=O)N(C)C(=O)N47C48C(=O)N(C)C(=O)N48C49C(=O)N(C)C(=O)N49C50C(=O)N(C)C(=O)N50C51C(=O)N(C)C(=O)N51C52C(=O)N(C)C(=O)N52C53C(=O)N(C)C(=O)N53C54C(=O)N(C)C(=O)N54C55C(=O)N(C)C(=O)N55C56C(=O)N(C)C(=O)N56C57C(=O)N(C)C(=O)N57C58C(=O)N(C)C(=O)N58C59C(=O)N(C)C(=O)N59C60C(=O)N(C)C(=O)N60C61C(=O)N(C)C(=O)N61C62C(=O)N(C)C(=O)N62C63C(=O)N(C)C(=O)N63C64C(=O)N(C)C(=O)N64C65C(=O)N(C)C(=O)N65C66C(=O)N(C)C(=O)N66C67C(=O)N(C)C(=O)N67C68C(=O)N(C)C(=O)N68C69C(=O)N(C)C(=O)N69C70C(=O)N(C)C(=O)N70C71C(=O)N(C)C(=O)N71C72C(=O)N(C)C(=O)N72C73C(=O)N(C)C(=O)N73C74C(=O)N(C)C(=O)N74C75C(=O)N(C)C(=O)N75C76C(=O)N(C)C(=O)N76C77C(=O)N(C)C(=O)N77C78C(=O)N(C)C(=O)N78C79C(=O)N(C)C(=O)N79C80C(=O)N(C)C(=O)N80C81C(=O)N(C)C(=O)N81C82C(=O)N(C)C(=O)N82C83C(=O)N(C)C(=O)N83C84C(=O)N(C)C(=O)N84C85C(=O)N(C)C(=O)N85C86C(=O)N(C)C(=O)N86C87C(=O)N(C)C(=O)N87C88C(=O)N(C)C(=O)N88C89C(=O)N(C)C(=O)N89C90C(=O)N(C)C(=O)N90C91C(=O)N(C)C(=O)N91C92C(=O)N(C)C(=O)N92C93C(=O)N(C)C(=O)N93C94C(=O)N(C)C(=O)N94C95C(=O)N(C)C(=O)N95C96C(=O)N(C)C(=O)N96C97C(=O)N(C)C(=O)N97C98C(=O)N(C)C(=O)N98C99C(=O)N(C)C(=O)N99C100C(=O)N(C)C(=O)N100C101C(=O)N(C)C(=O)N101C102C(=O)N(C)C(=O)N102C103C(=O)N(C)C(=O)N103C104C(=O)N(C)C(=O)N104C105C(=O)N(C)C(=O)N105C106C(=O)N(C)C(=O)N106C107C(=O)N(C)C(=O)N107C108C(=O)N(C)C(=O)N108C109C(=O)N(C)C(=O)N109C110C(=O)N(C)C(=O)N110C111C(=O)N(C)C(=O)N111C112C(=O)N(C)C(=O)N112C113C(=O)N(C)C(=O)N113C114C(=O)N(C)C(=O)N114C115C(=O)N(C)C(=O)N115C116C(=O)N(C)C(=O)N116C117C(=O)N(C)C(=O)N117C118C(=O)N(C)C(=O)N118C119C(=O)N(C)C(=O)N119C120C(=O)N(C)C(=O)N120C121C(=O)N(C)C(=O)N121C122C(=O)N(C)C(=O)N122C123C(=O)N(C)C(=O)N123C124C(=O)N(C)C(=O)N124C125C(=O)N(C)C(=O)N125C126C(=O)N(C)C(=O)N126C127C(=O)N(C)C(=O)N127C128C(=O)N(C)C(=O)N128C129C(=O)N(C)C(=O)N129C130C(=O)N(C)C(=O)N130C131C(=O)N(C)C(=O)N131C132C(=O)N(C)C(=O)N132C133C(=O)N(C)C(=O)N133C134C(=O)N(C)C(=O)N134C135C(=O)N(C)C(=O)N135C136C(=O)N(C)C(=O)N136C137C(=O)N(C)C(=O)N137C138C(=O)N(C)C(=O)N138C139C(=O)N(C)C(=O)N139C140C(=O)N(C)C(=O)N140C141C(=O)N(C)C(=O)N141C142C(=O)N(C)C(=O)N142C143C(=O)N(C)C(=O)N143C144C(=O)N(C)C(=O)N144C145C(=O)N(C)C(=O)N145C146C(=O)N(C)C(=O)N146C147C(=O)N(C)C(=O)N147C148C(=O)N(C)C(=O)N148C149C(=O)N(C)C(=O)N149C150C(=O)N(C)C(=O)N150C151C(=O)N(C)C(=O)N151C152C(=O)N(C)C(=O)N152C153C(=O)N(C)C(=O)N153C154C(=O)N(C)C(=O)N154C155C(=O)N(C)C(=O)N155C156C(=O)N(C)C(=O)N156C157C(=O)N(C)C(=O)N157C158C(=O)N(C)C(=O)N158C159C(=O)N(C)C(=O)N159C160C(=O)N(C)C(=O)N160C161C(=O)N(C)C(=O)N161C162C(=O)N(C)C(=O)N162C163C(=O)N(C)C(=O)N163C164C(=O)N(C)C(=O)N164C165C(=O)N(C)C(=O)N165C166C(=O)N(C)C(=O)N166C167C(=O)N(C)C(=O)N167C168C(=O)N(C)C(=O)N168C169C(=O)N(C)C(=O)N169C170C(=O)N(C)C(=O)N170C171C(=O)N(C)C(=O)N171C172C(=O)N(C)C(=O)N172C173C(=O)N(C)C(=O)N173C174C(=O)N(C)C(=O)N174C175C(=O)N(C)C(=O)N175C176C(=O)N(C)C(=O)N176C177C(=O)N(C)C(=O)N177C178C(=O)N(C)C(=O)N178C179C(=O)N(C)C(=O)N179C180C(=O)N(C)C(=O)N180C181C(=O)N(C)C(=O)N181C182C(=O)N(C)C(=O)N182C183C(=O)N(C)C(=O)N183C184C(=O)N(C)C(=O)N184C185C(=O)N(C)C(=O)N185C186C(=O)N(C)C(=O)N186C187C(=O)N(C)C(=O)N187C188C(=O)N(C)C(=O)N188C189C(=O)N(C)C(=O)N189C190C(=O)N(C)C(=O)N190C191C(=O)N(C)C(=O)N191C192C(=O)N(C)C(=O)N192C193C(=O)N(C)C(=O)N193C194C(=O)N(C)C(=O)N194C195C(=O)N(C)C(=O)N195C196C(=O)N(C)C(=O)N196C197C(=O)N(C)C(=O)N197C198C(=O)N(C)C(=O)N198C199C(=O)N(C)C(=O)N199C200C(=O)N(C)C(=O)N200C201C(=O)N(C)C(=O)N201C202C(=O)N(C)C(=O)N202C203C(=O)N(C)C(=O)N203C204C(=O)N(C)C(=O)N204C205C(=O)N(C)C(=O)N205C206

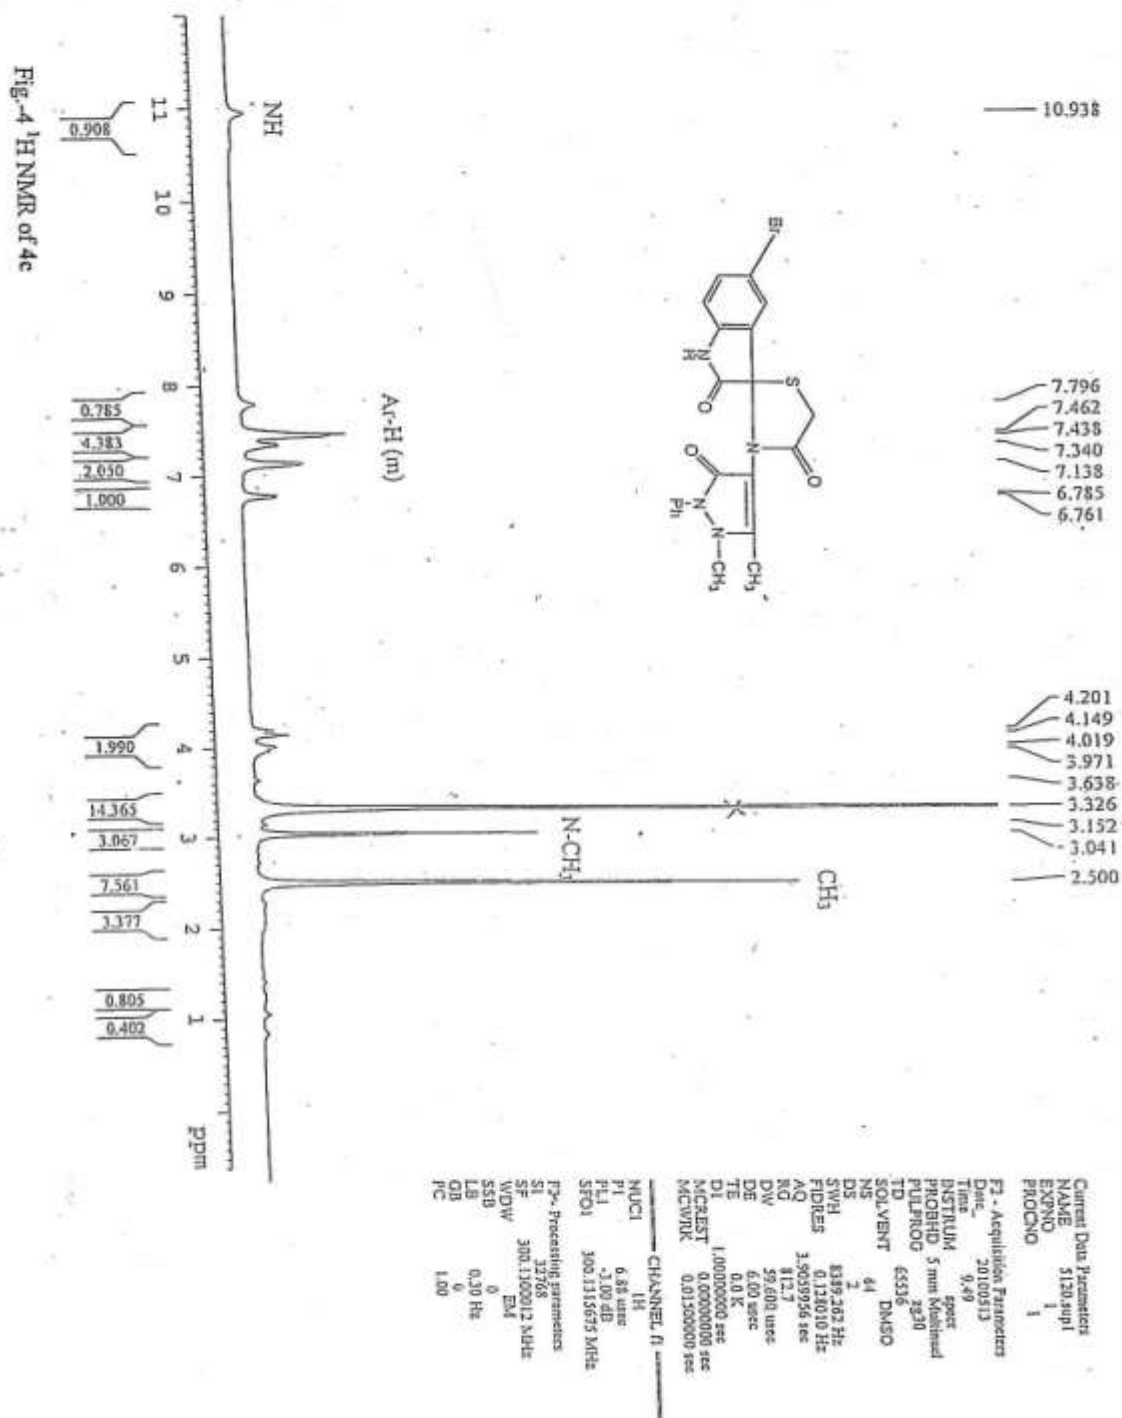

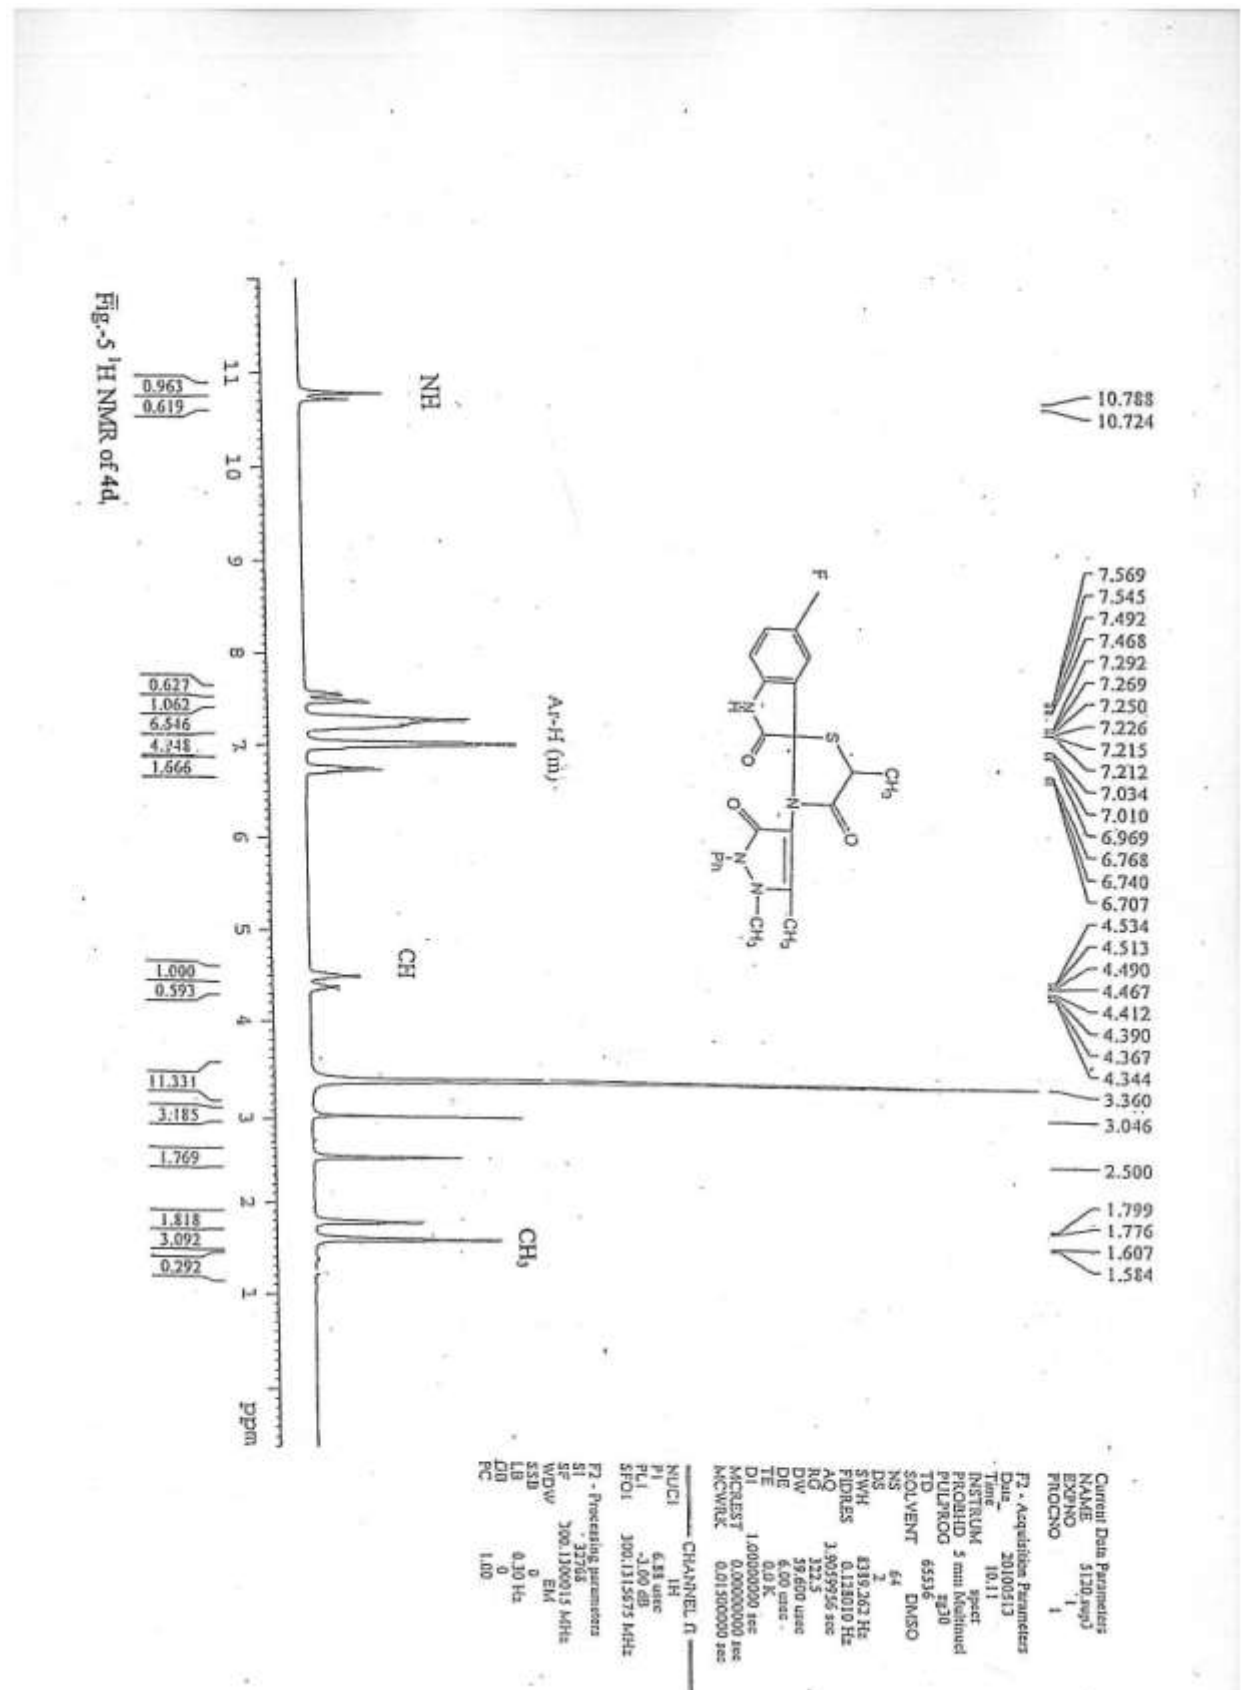



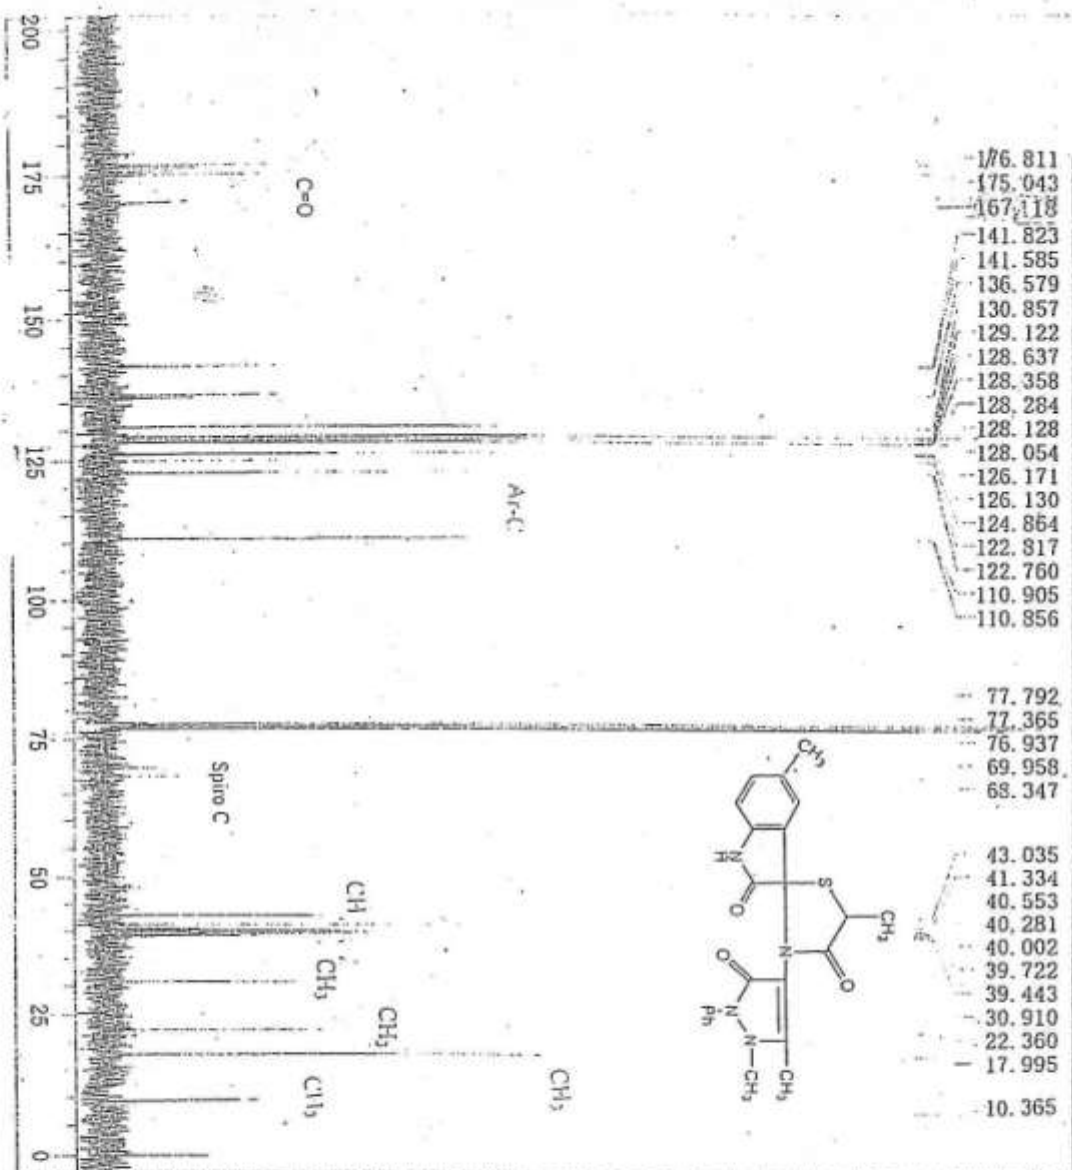[illegible]

|                    |      |
|--------------------|------|
| 75.45              | MHz  |
| 124.00             | MHz  |
| 1840.00            | Hz   |
| 5.50               | usec |
| 26.66              | usec |
| 0.20000            | msec |
| 1.0000             | msec |
| 32768              |      |
| 32768              |      |
| 640                |      |
| 1                  |      |
| 20356.23           | Hz   |
| 19.61              | usec |
| 1.6097             | sec  |
| 1.3900             | sec  |
| 16                 |      |
| 23                 |      |
| 1.00               | Hz   |
| 0.00               |      |
| 0.00               |      |
| 90.00              |      |
| 100.00             |      |
| level, complete, & |      |
| 300.40             | MHz  |
| 130.00             | KHz  |
| 1150.00            | Hz   |
| 50                 | usec |
| 511                |      |
| FINNR998BDATAV     |      |
| ERSITYSuman K      |      |
| 25.60              | KHz  |
| 52.0               | Hz   |
| 180                |      |
| 26                 |      |
| 134                |      |
| 279                |      |
| 13                 | Hz   |

C:\WINNMR98\DATA\VC13EE  
UNIVERSITY Suman Kumar  
25 60 44

C:\WINNMR98\DATA\WC13B004061

BiLevel, complete, decoupling  
IH  
200 10'

Bilevel, complete, decoupling



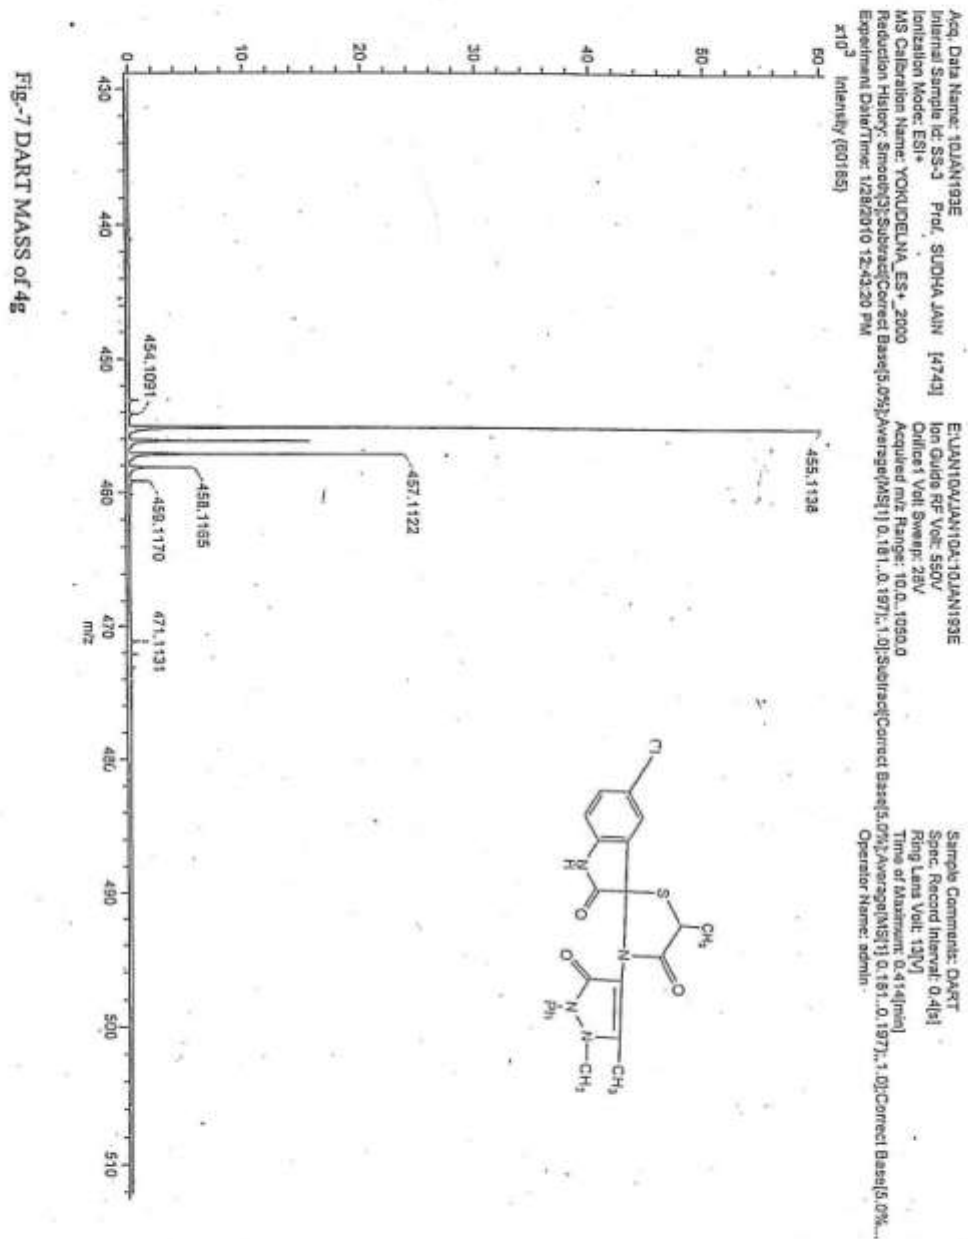

Fig.-7 DART MASS of 4g

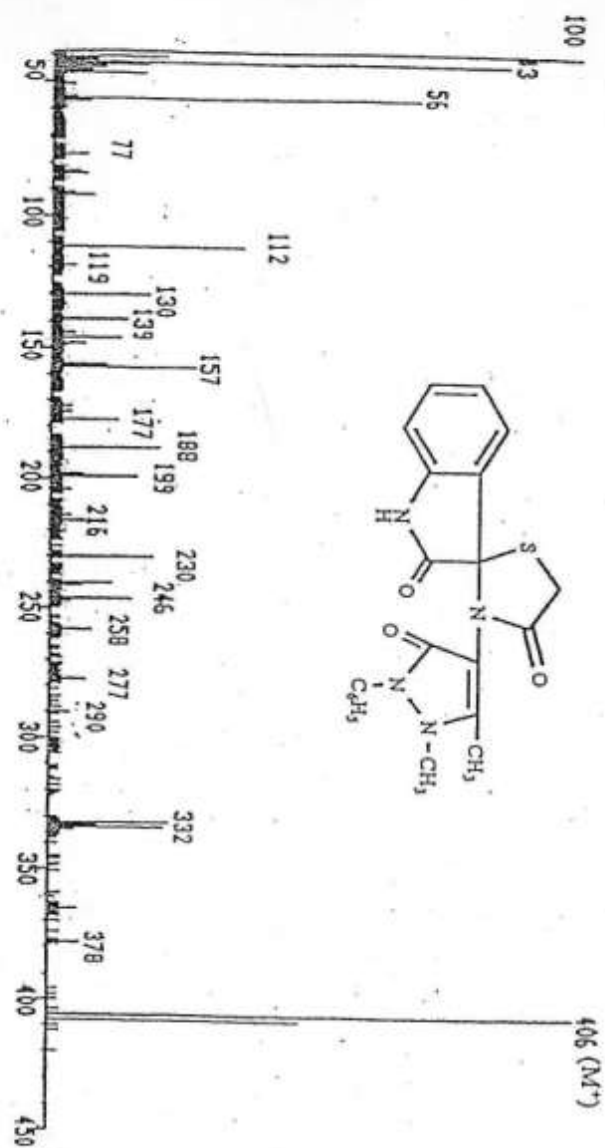

Fig.-8 EIMS MASS of 4h

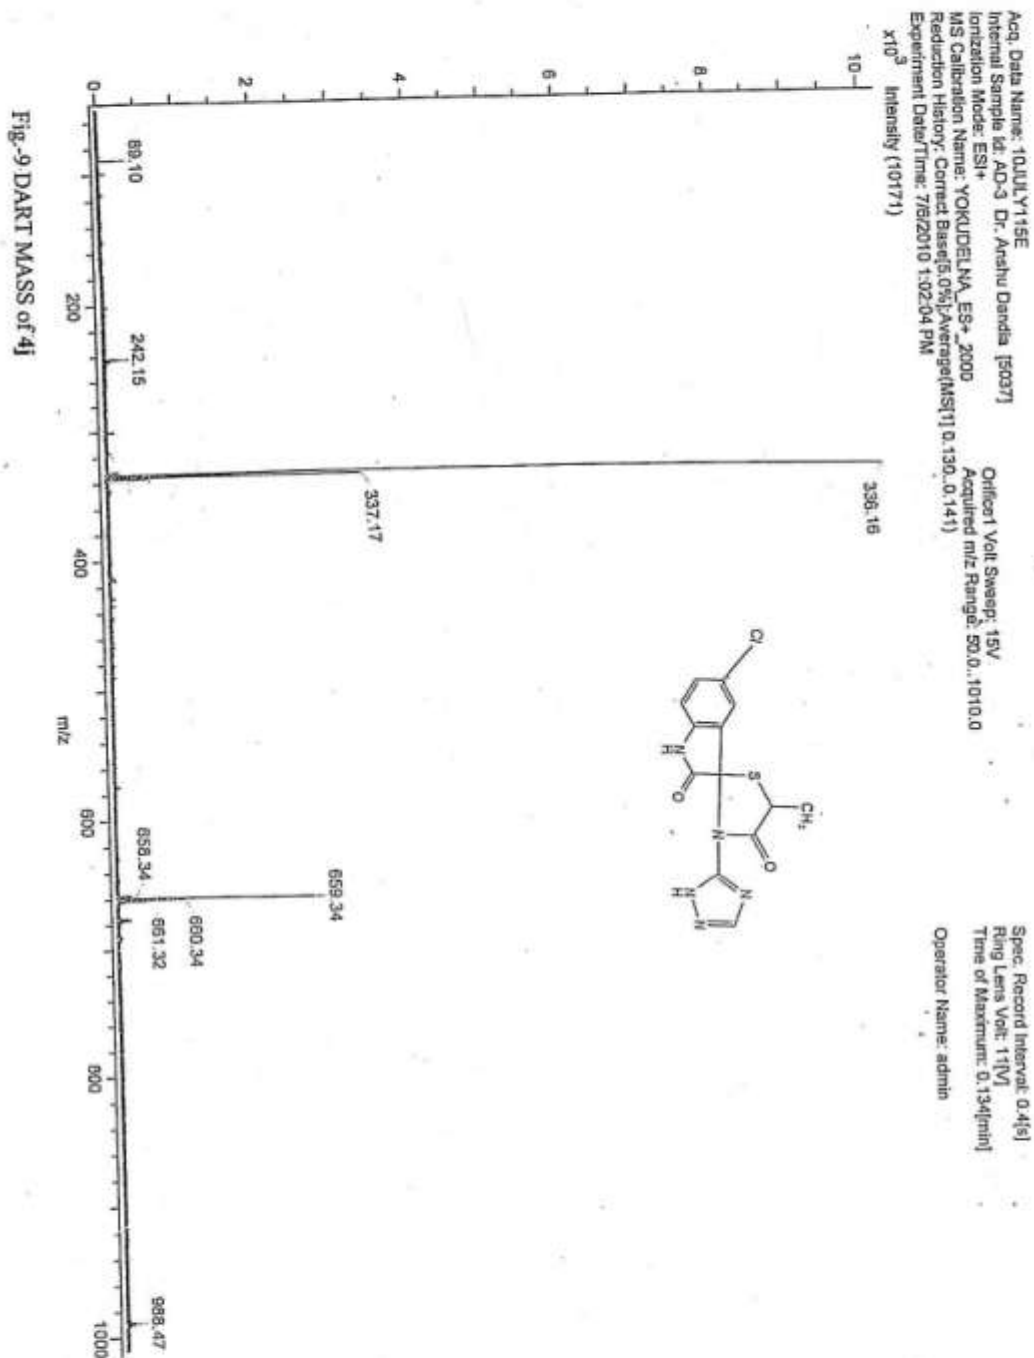

Fig.-9 DART MASS of 4j

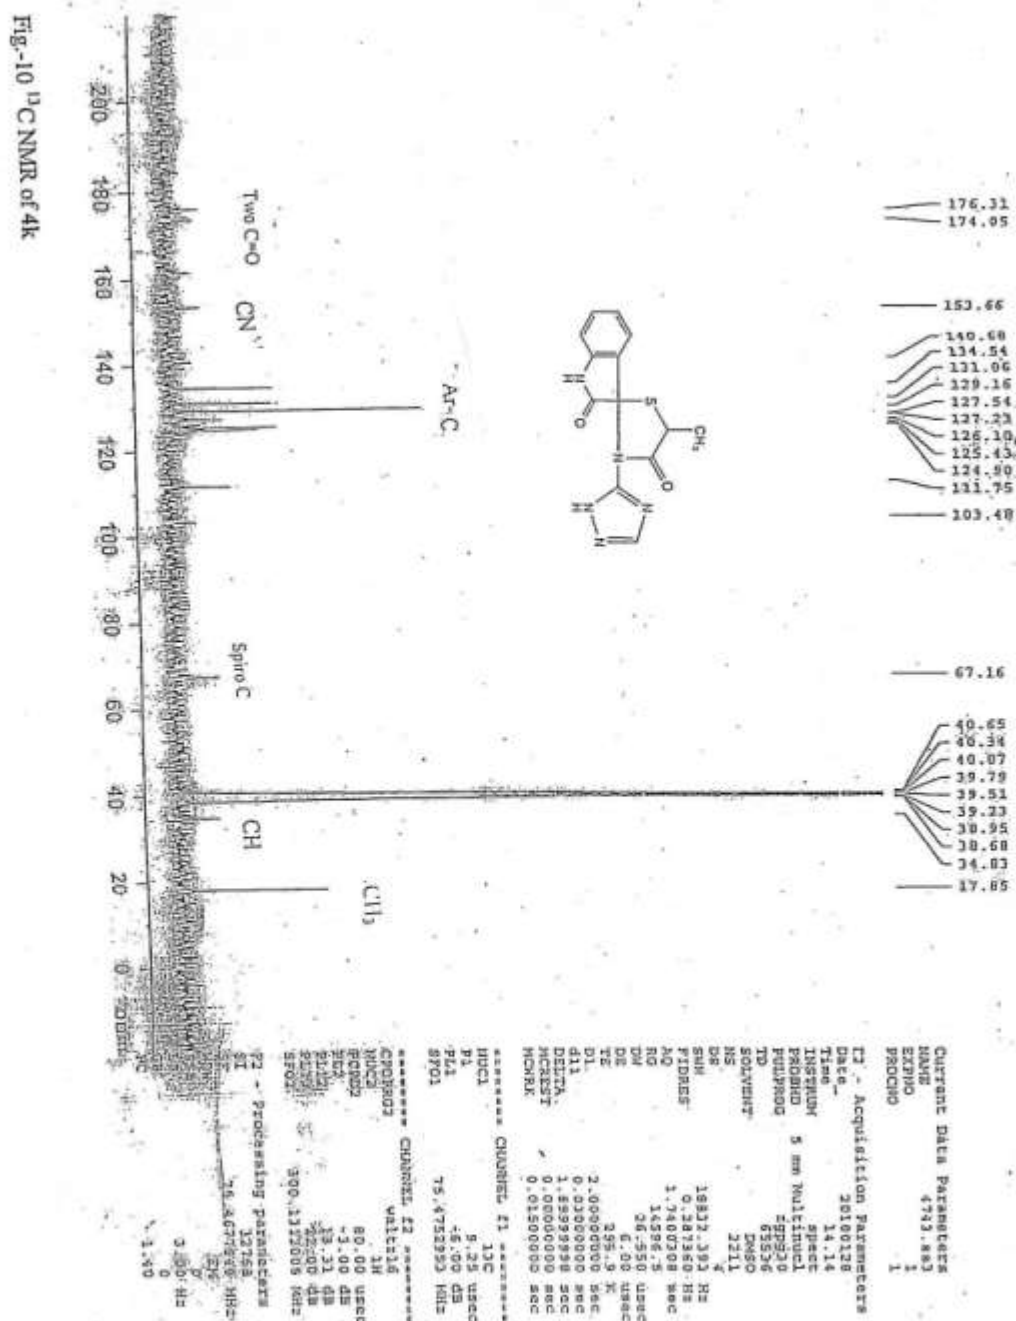

Fig.-11 EIMS MASS of 4k

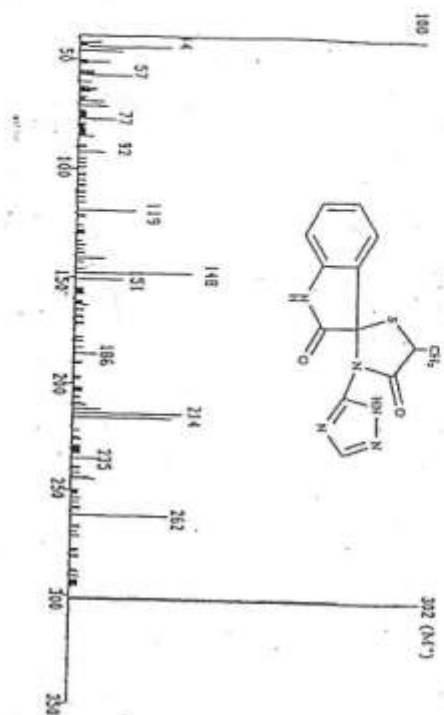

Fig-12 <sup>1</sup>H NMR of 4l

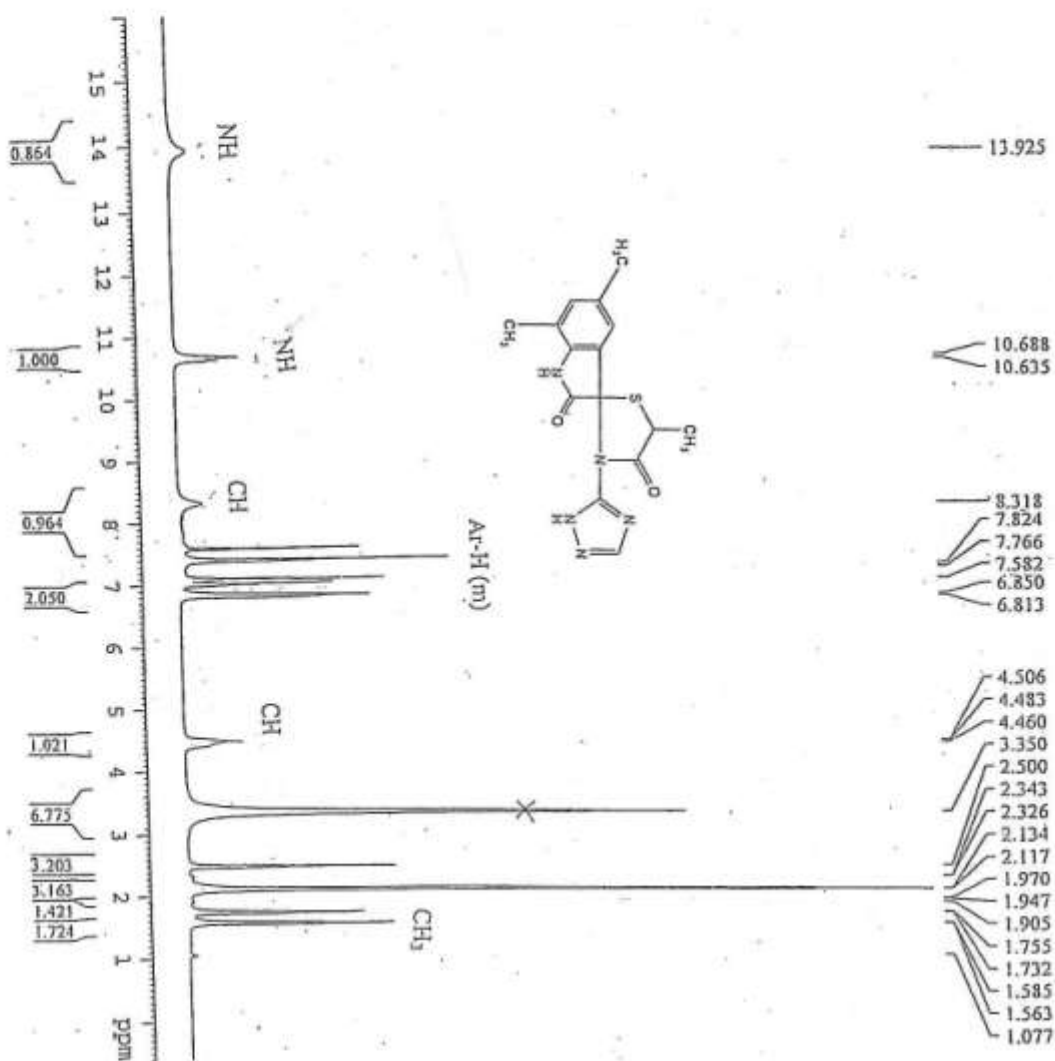

Current Data Parameters  
NAME 499r.ssq  
EXPNO 1  
PROCNO 1

F2 - Acquisition Parameters  
Date\_ 20100414  
Time 11.27  
INSTRUM spect  
PROBHD 5 mm Multinucl  
PULPROG zg30  
TD 65536  
FIDRES 0.146157 Hz  
AQ 3.4210291 sec  
RG 406.4  
PC 52.200 usec  
DE 6.00 usec  
TE 298.2 K  
DI 1.00000000 sec  
SFO1 300.1318534 MHz  
PC 1.00

Processing parameters  
SI 32768  
SF 600.130011 MHz  
WDW EM  
SSB 0  
LB 0.30 Hz  
GB 0  
PC 1.00

===== CHANNEL f1 =====  
NUC1 1H  
P1 6.88 usec  
PL1 -3.00 dB  
SFO1 300.1318534 MHz

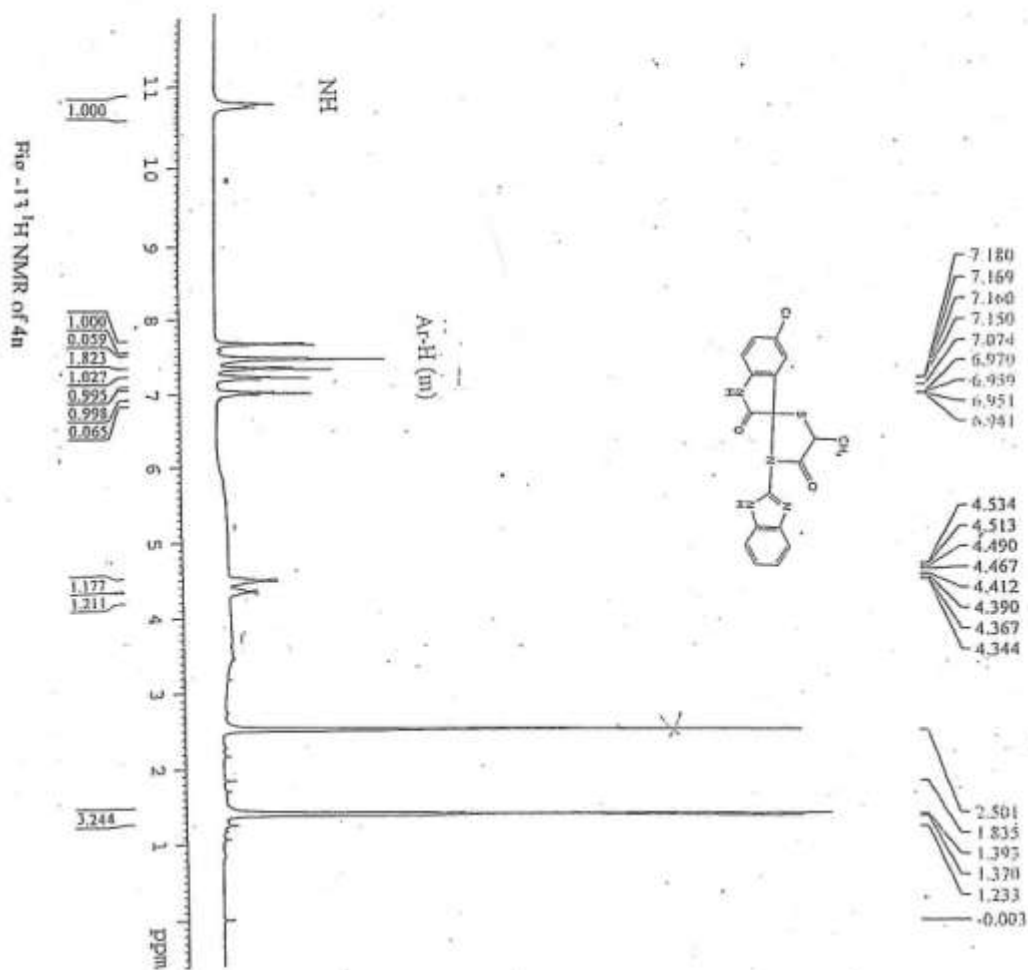

Current Data Parameters  
NAME 4998.sr2  
EXNO 1  
PROCNO 1

F2 - Acquisition Parameters  
Date\_ 20100414  
Time\_ 11.14  
INSTRUM spect  
PROBHD 5 mm MULTINUC1  
PULPROG zg30  
TD 65536  
FIDRES 0.0000000  
SOLVENT DMSO  
NS 64  
DS 2  
SFO 397.954 MHz  
FIDRES 0.146157 Hz  
AQ 1.4210291 sec  
RG 574.7  
DE 52.200 usec  
TE 298.1 K  
D1 1.00000000 sec  
DCREST 0.00000000 sec  
MCNMR 0.01500000 sec

===== CHANNEL f1 =====  
NUC1 1H  
P1 6.88 usec  
PL1 -1.00 dB  
SFO1 300.1378514 MHz

F2 - Processing parameters  
SI 32768  
SF 300.1300011 MHz  
WDW EM  
SSB 0  
LB 0.30 Hz  
GB 0  
PC 1.00



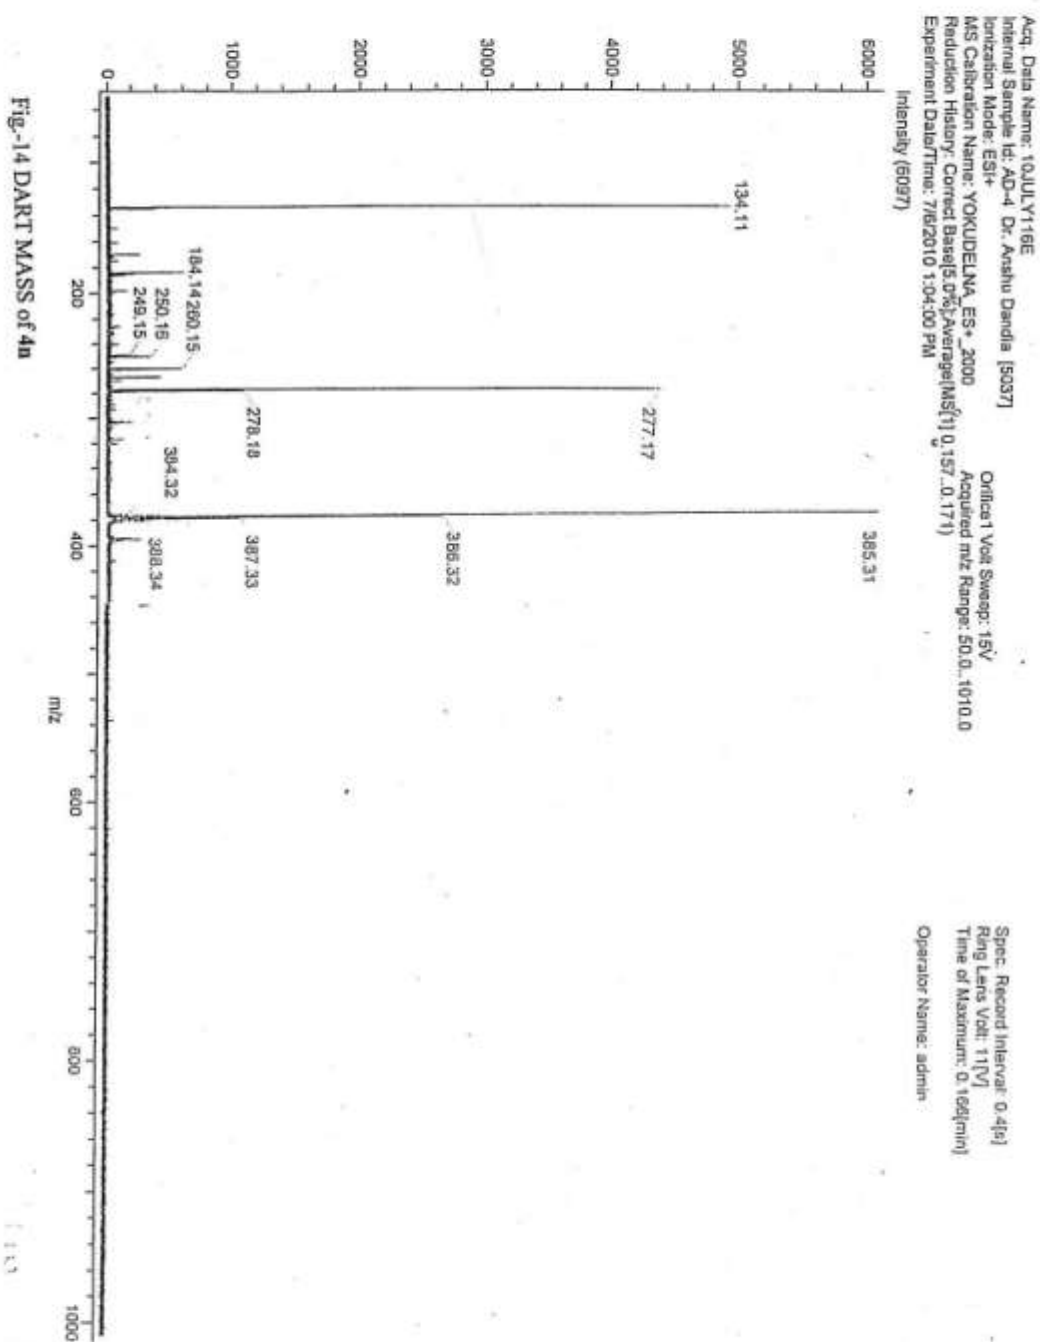

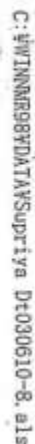

Fig.-16 <sup>1</sup>H NMR of 4s

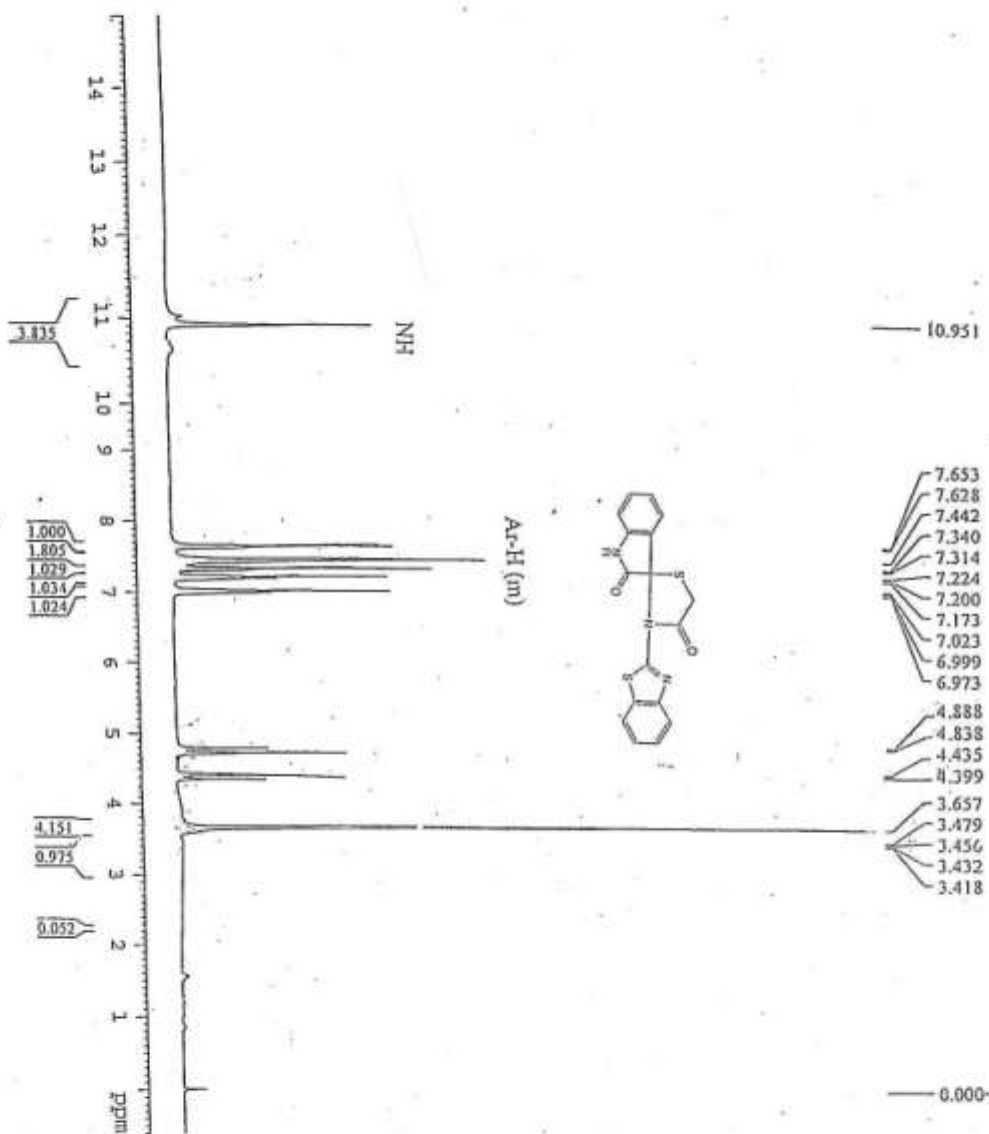

Current Data Parameters  
NAME 5071.jr1  
EXPNO 1  
PROCNO 1  
F2 - Acquisition Parameters  
Date\_ 20100521  
Time 14.51  
INSTRUM spect  
PROBHD 5 mm Moltind  
PULPROG zg30  
TD 65536  
SOLVENT DMSO  
NS 64  
DS 2  
SWH 8315.262 Hz  
FIDRES 0.128016 Hz  
AQ 3.905926 sec  
RG 1024  
DW 29.600 usec  
DE 4.00 usec  
TE 300.2 K  
T1 0.13 sec  
T1RHO 0.0000000  
MCREST 1.00000000 sec  
MCVARK 0.01300000 sec

CHANNEL f1  
NUC1 1H  
P1 6.48 usec  
PL1 -3.00 dB  
SFO1 300.1300128 MHz

F2 - Processing parameters  
SI 32768  
SF 300.1300003 MHz  
WDW EM  
SSB 0  
LB 0.30 Hz  
GB 0  
PC 1.00

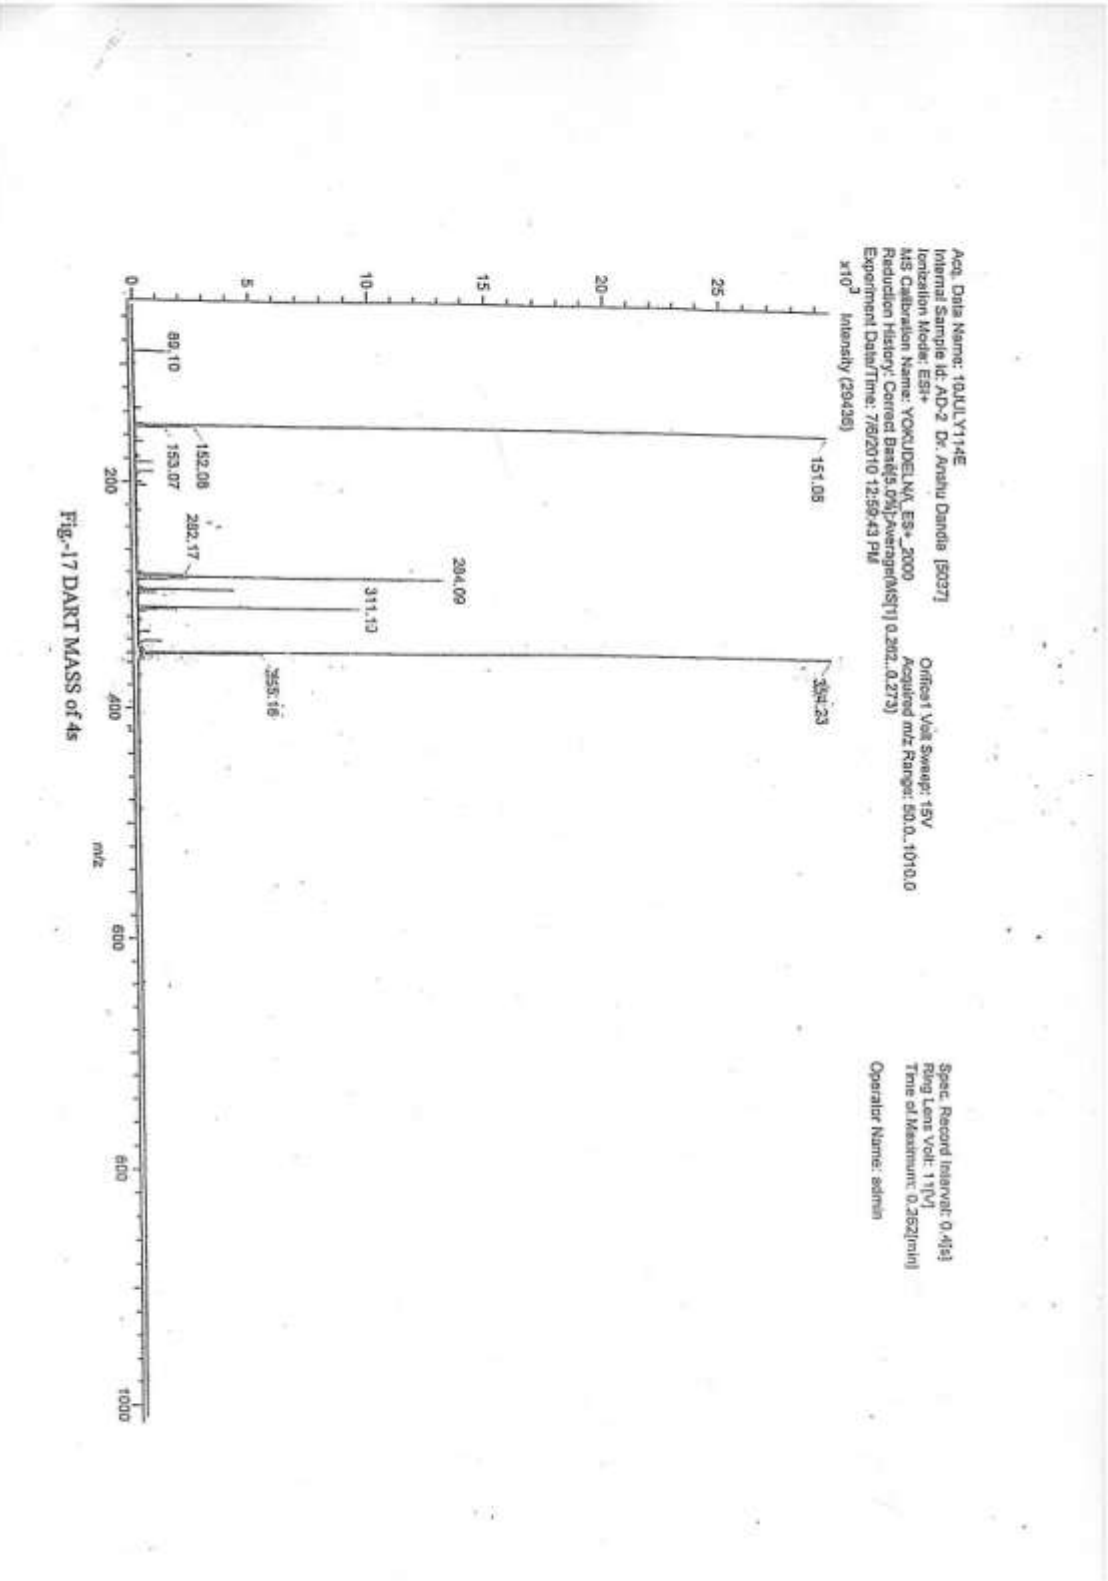

Fig.-17 DART MASS of 4s

Fig.-18 <sup>13</sup>C NMR of 4t

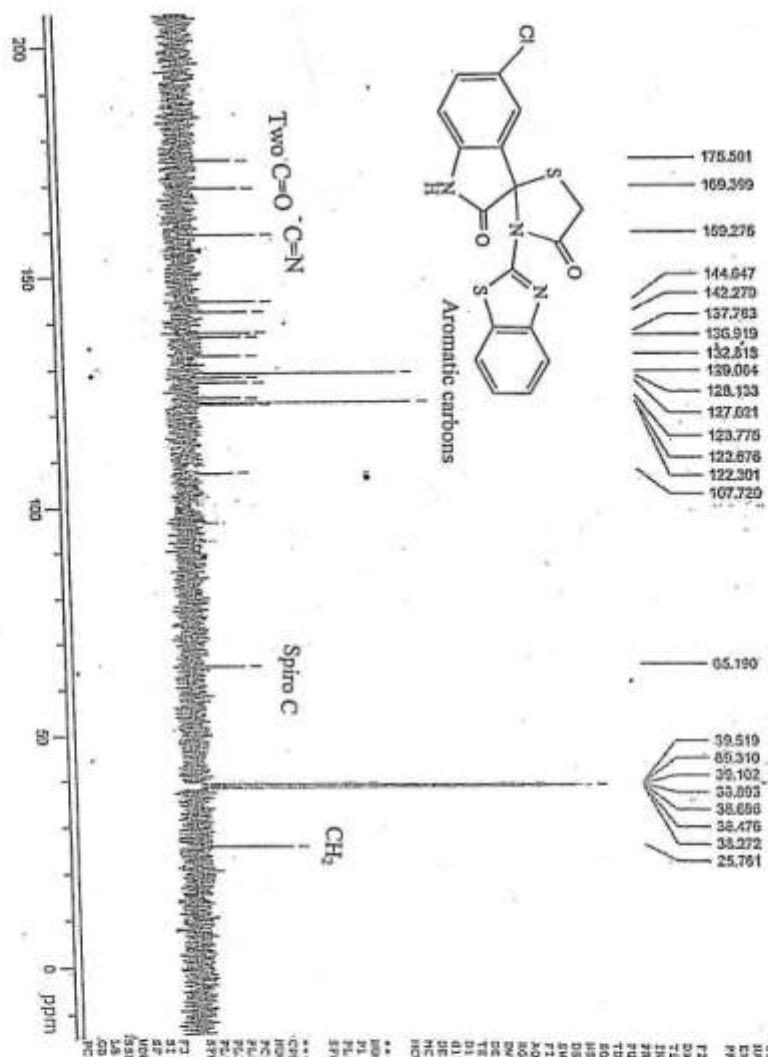

Current Data Parameters  
NAME 4743\_022  
EXPNO 1  
PROCNO 1  
F2 - Acquisition Parameters  
Date\_ 20110316  
Time 15.43  
INSTRUM spect  
PROBHD 5 mm HULNMR1  
PULPROG zgpg30  
TD 65536  
FIDRES 0.2516  
AQ 8120  
RG 320  
DS 16811.357  
SOLVENT DMSO  
F2 - Processing parameters  
SI 32768  
SF 500.135095  
WDW EM  
SSB 0  
GB 0  
PC 1.06

===== CHANNEL f1 =====  
NUC1 13C  
P1 5.22  
PL1 -8.48  
SFO1 125.413125  
===== CHANNEL f2 =====  
CPDPRG2 waltz16  
NUC2 1H  
PCPD2 80.00  
PL2 -2.00  
PL3 -2.00  
PL4 20.00  
PL5 20.00  
SFO2 400.1518005  
===== CHANNEL f3 =====  
CPDPRG3 waltz16  
NUC3 1H  
PCPD3 80.00  
PL3 -2.00  
PL4 20.00  
PL5 20.00  
SFO3 400.1518005

Fig.-19 <sup>1</sup>H NMR of 4u

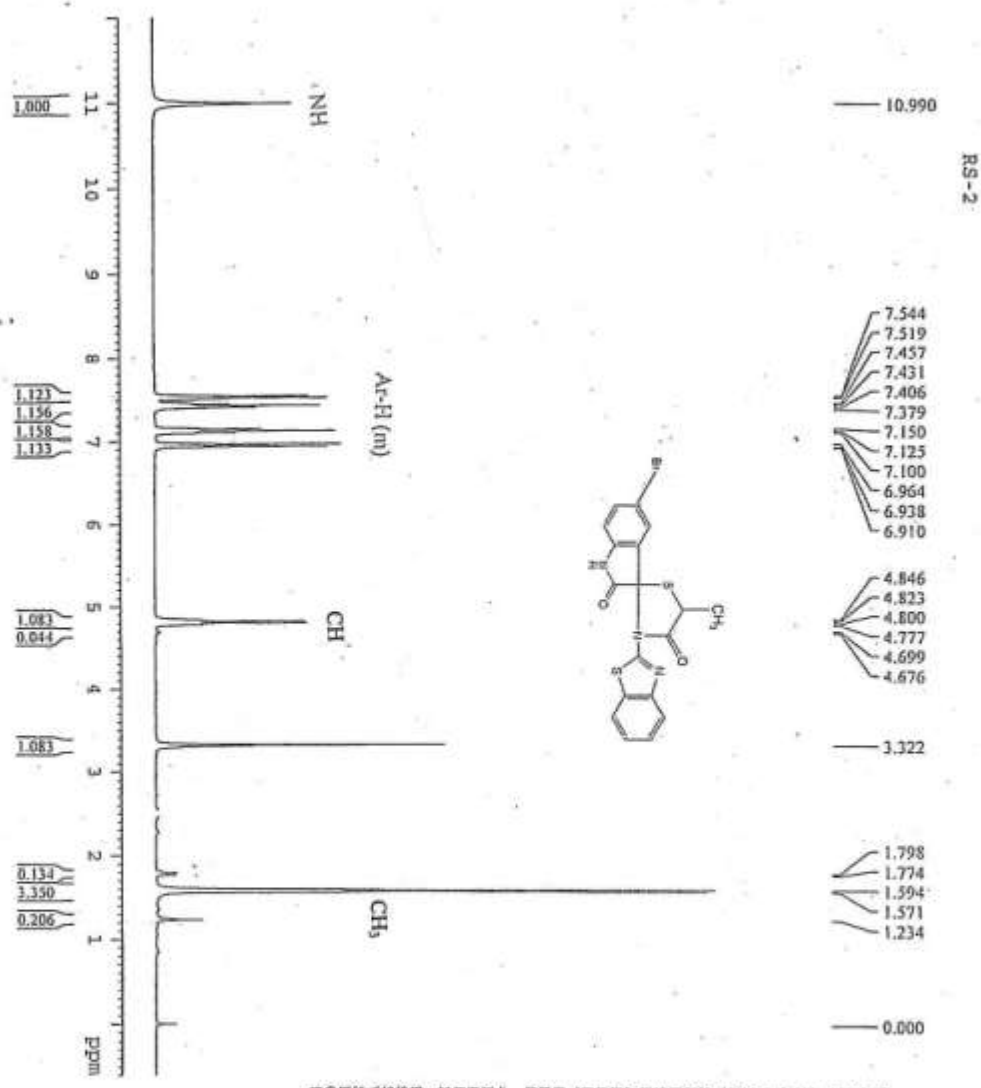

Current Data Parameters  
NAME 5071162  
EXPNO 1  
PROCNO 1  
F2 - Acquisition Parameters  
Date\_ 20100521  
Time 14.18  
INSTRUM spect  
PROBHD 5 mm Maltitud  
PULPROG zgpg30  
TD 65535  
SOLVENT d4  
NS 3  
DS 3  
SWH 836.160 Hz  
FIDRES 0.124010 Hz  
AQ 1.903956 sec  
RG 1024  
Dw 59.600 usec  
DE 6.00 usec  
TE 0.0 K  
D1 1.00000000 sec  
MCHEMT 0.00000000 sec  
MCWEX 0.01500000 sec  
NUC1 CHANNEL A  
P1 6.68 usec  
PL1 -1.20 dB  
SFO1 300.1320128 MHz  
F2 - Processing parameters  
SI 32768  
SF 300.135003 MHz  
WDW EM  
SSB 0  
LB 0.30 Hz  
GB 0  
PC 1.00

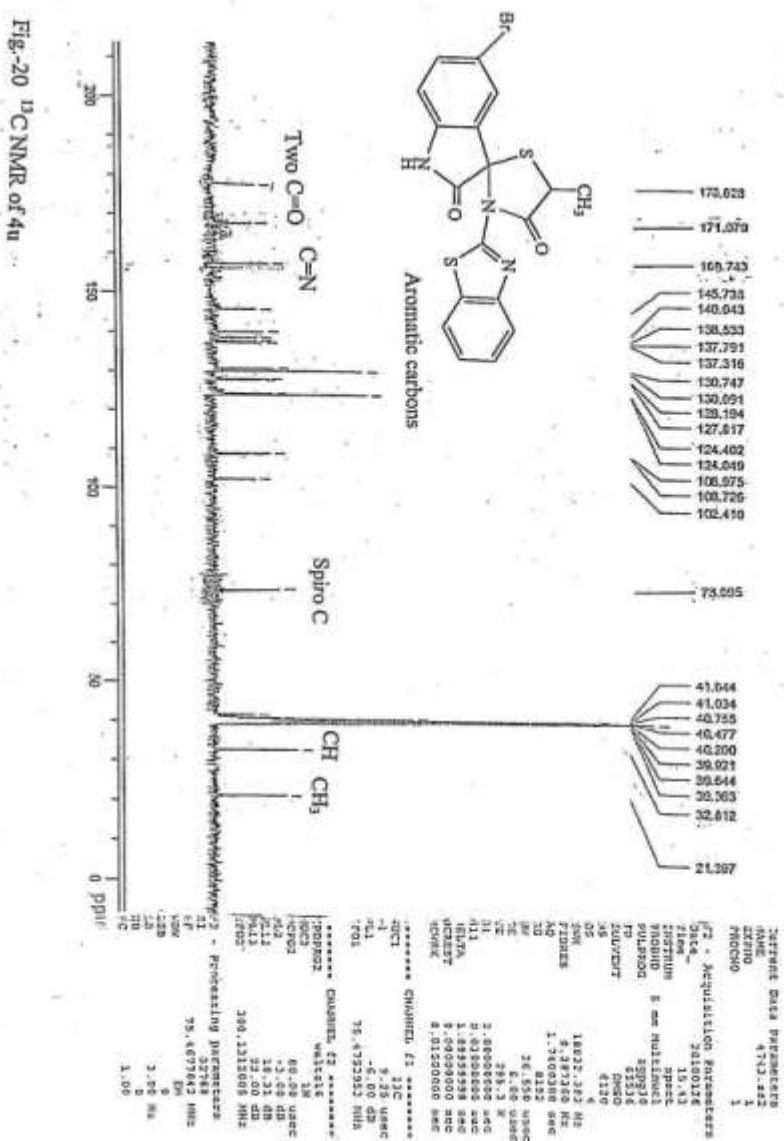



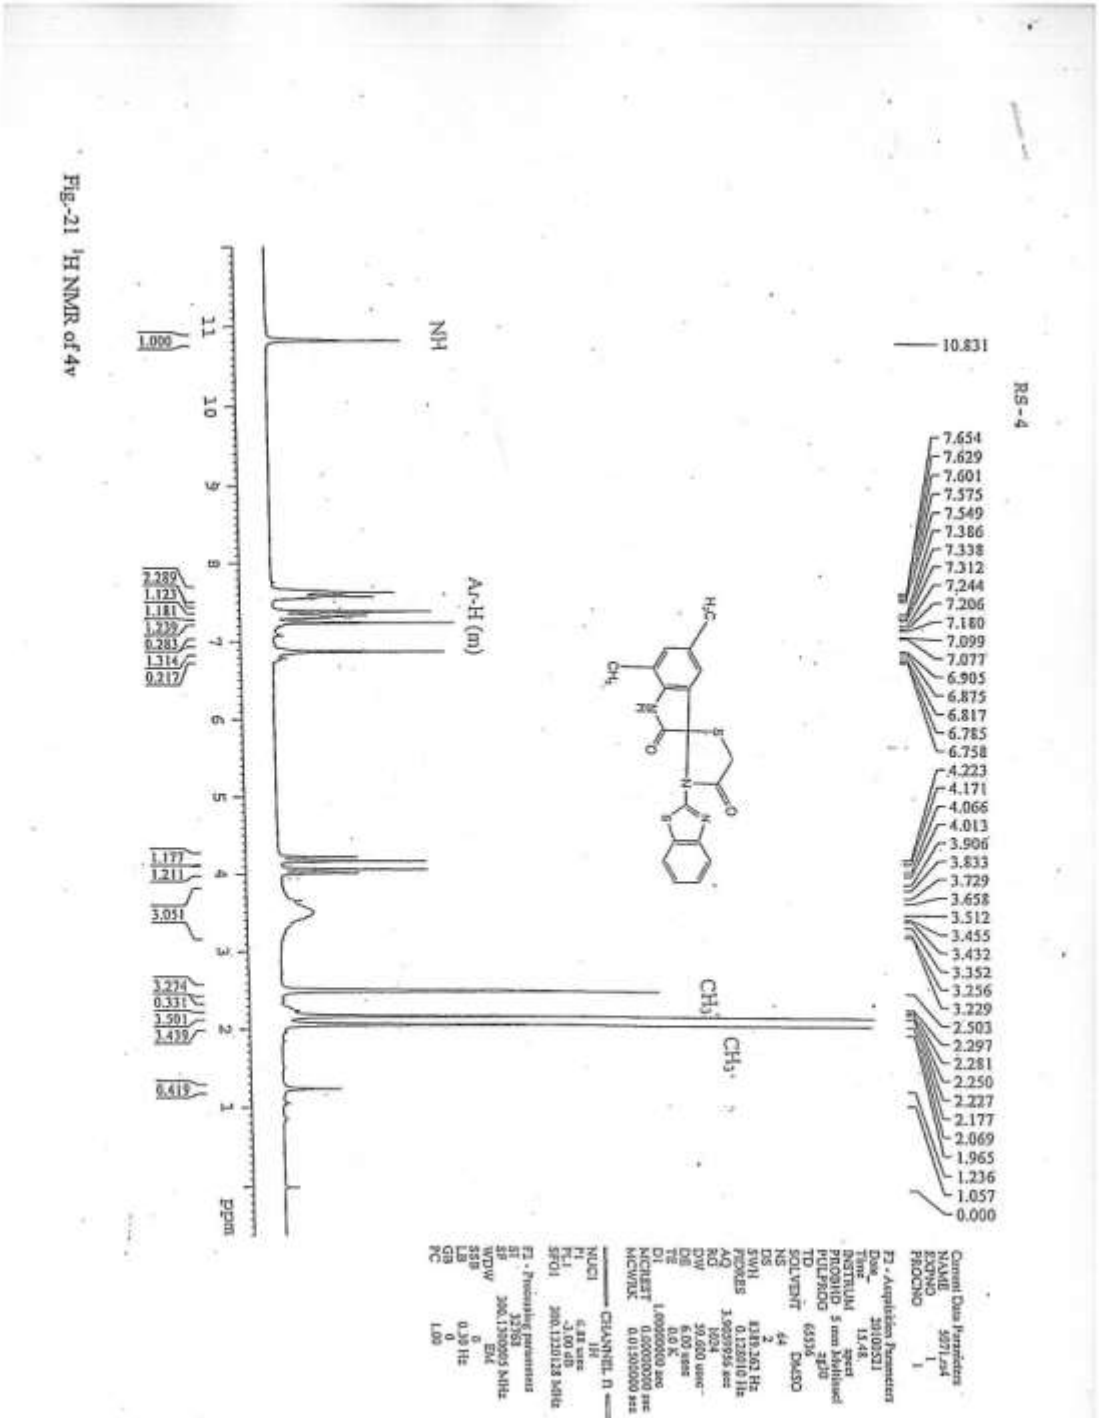



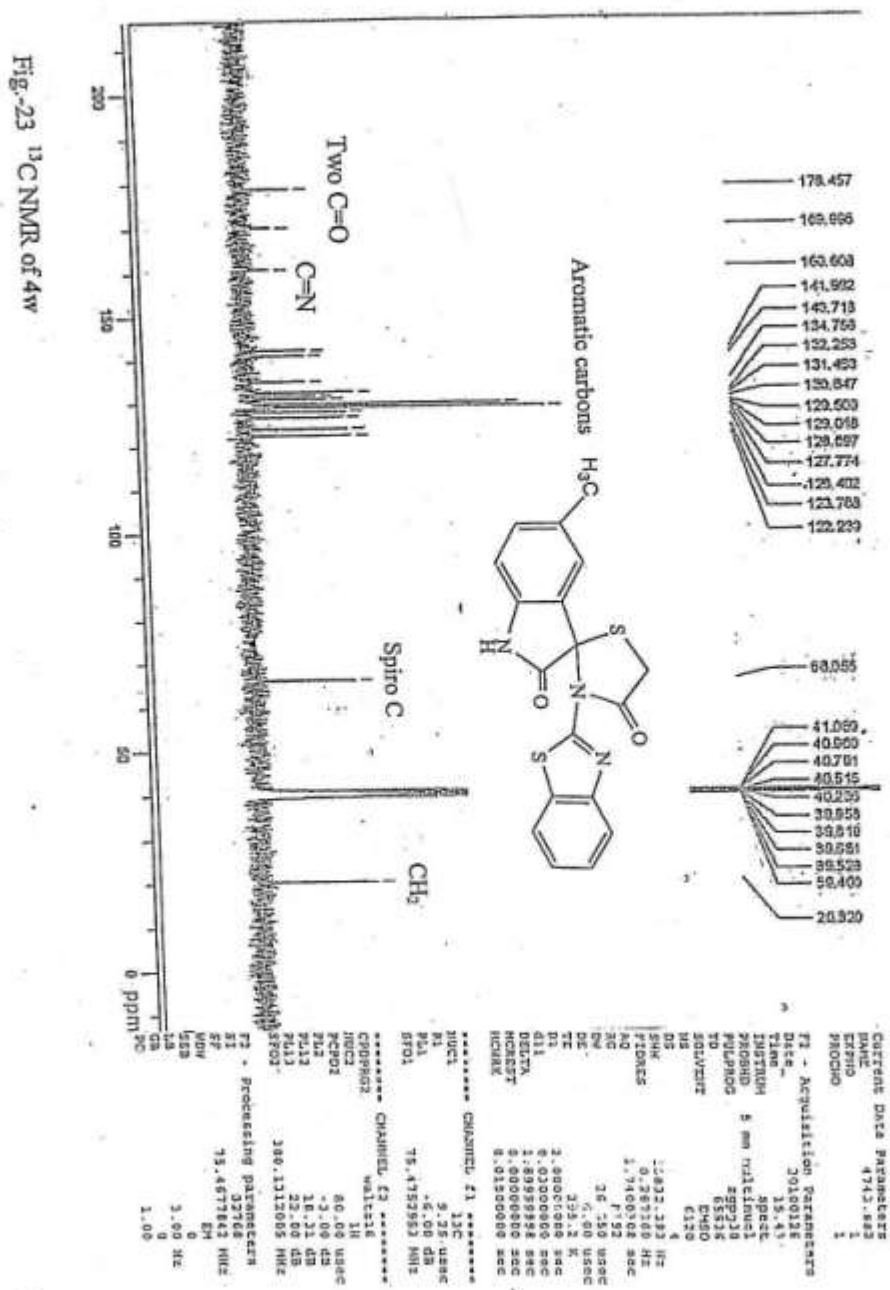

Fig. 24 <sup>1</sup>H NMR of 4x

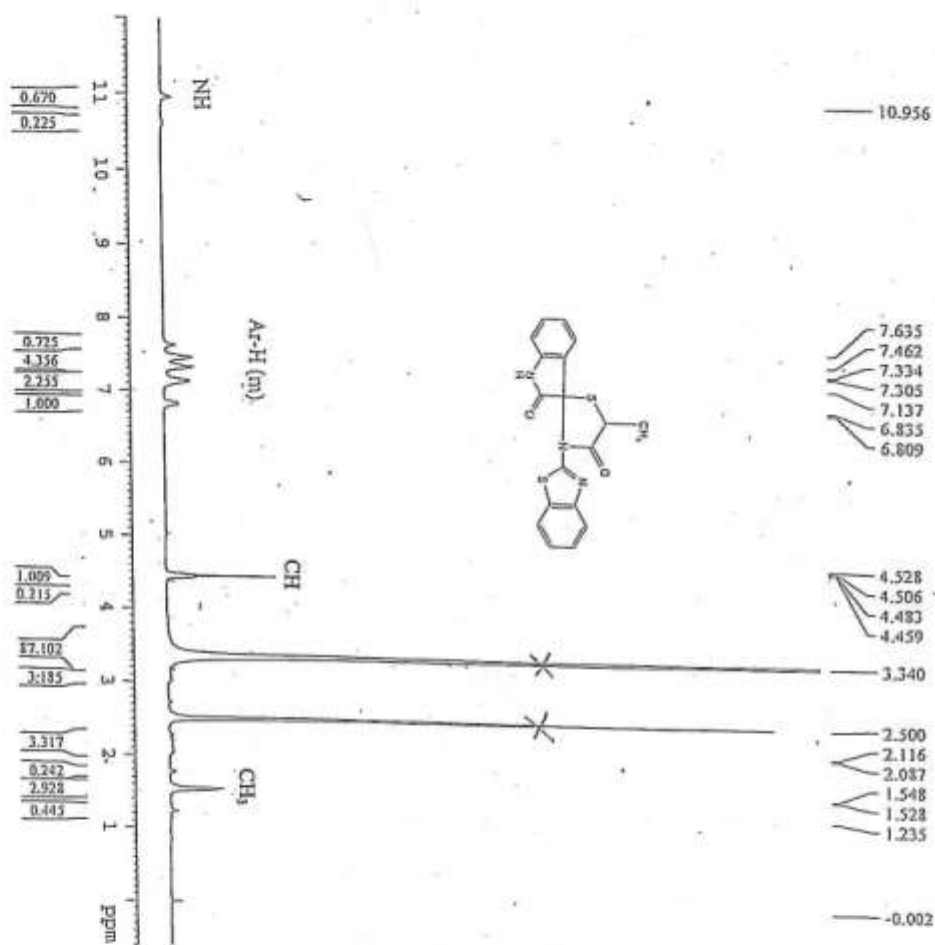

Current Data Parameters  
NAME 4998.f62  
EXPNO 1  
PROCNO 1

F2 - Acquisition Parameters  
Date\_ 20100416  
Time 10.59  
INSTRUM spect  
PROBHD 5 mm Multispec  
PULPROG zgpg30  
TD 65536  
FIDRES 0.0000000  
SOLVENT DMSO  
NS 64  
DS 2  
SWH 9578.544 Hz  
FWHM 0.146157 Hz  
AQ 3.4310291 sec  
RG 574.7  
NO 52.200  
DN 4.00 usec  
DE 288.0 K  
TE 1.00000000 sec  
DI 0.00000000 sec  
MCHEST 0.01900000 sec  
NAMEX

===== CHANNEL f1 =====  
NUC1 13X  
P1 5.88 usec  
PL1 -3.00 dB  
SFO1 300.1318534 MHz

F2 - Processing parameters  
SI 32768  
SF 300.1300011 MHz  
WDW EM  
SSB 0  
LB 0.30 Hz  
GB 0  
PC 1.00

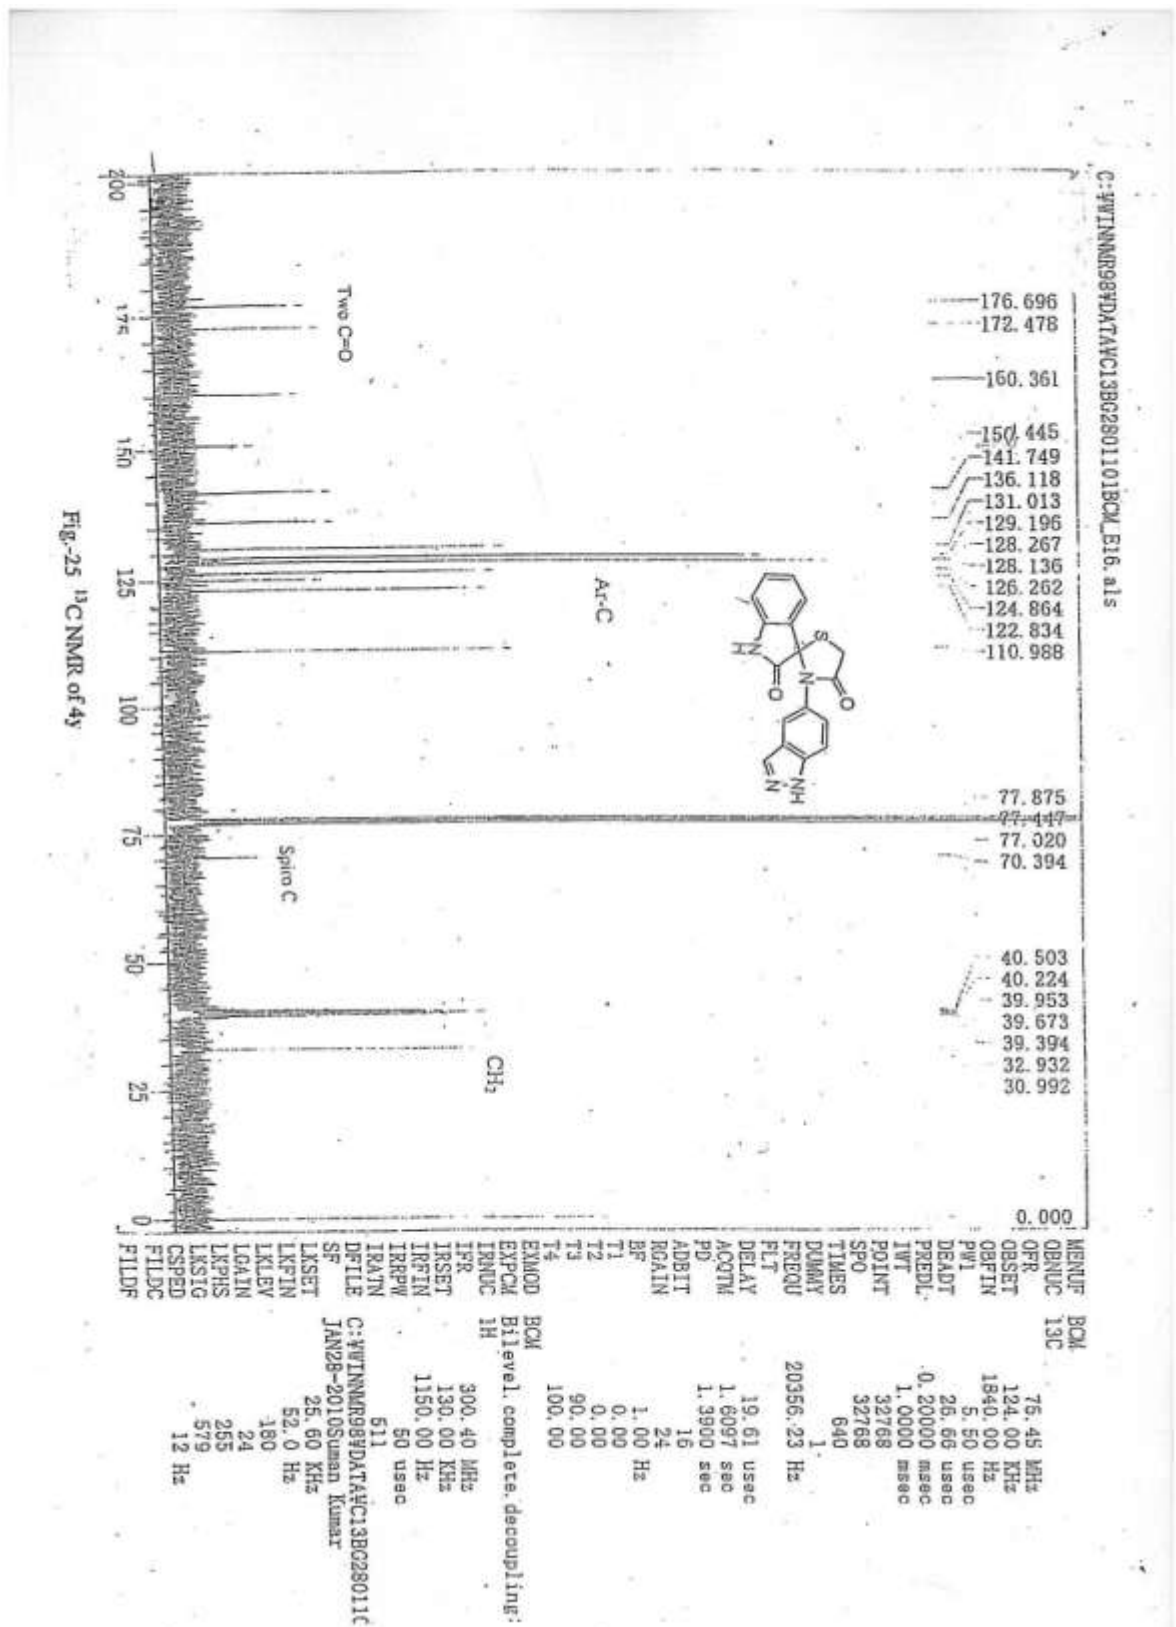

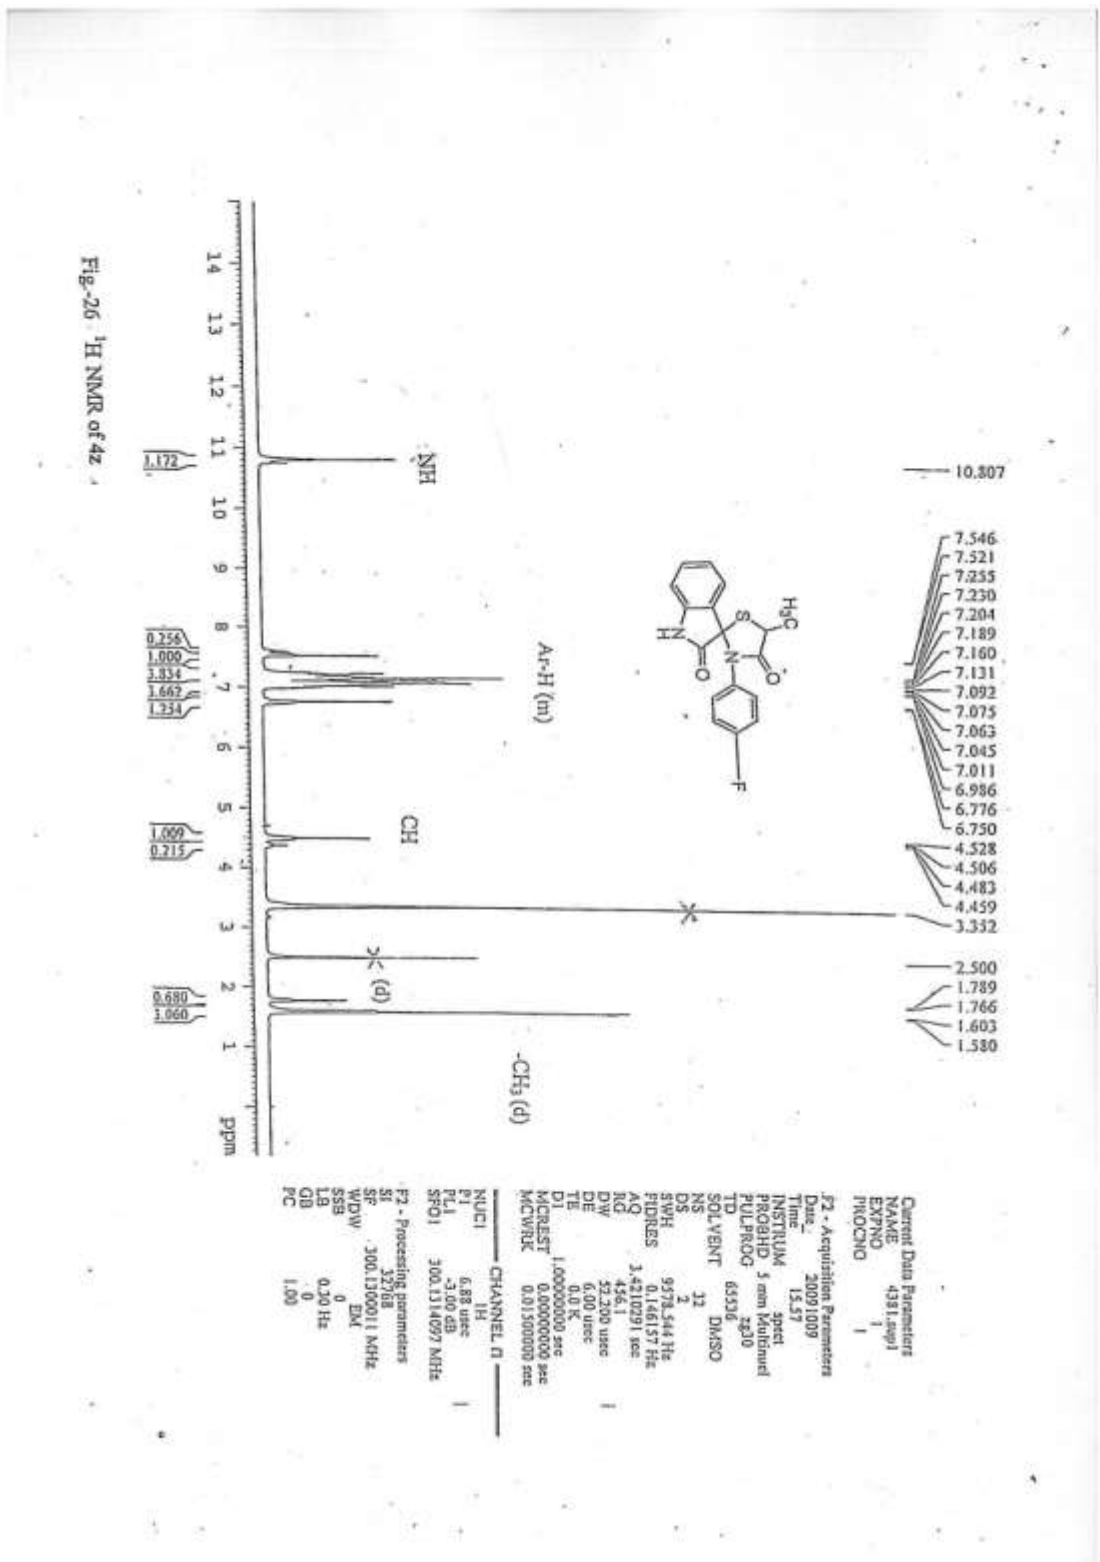



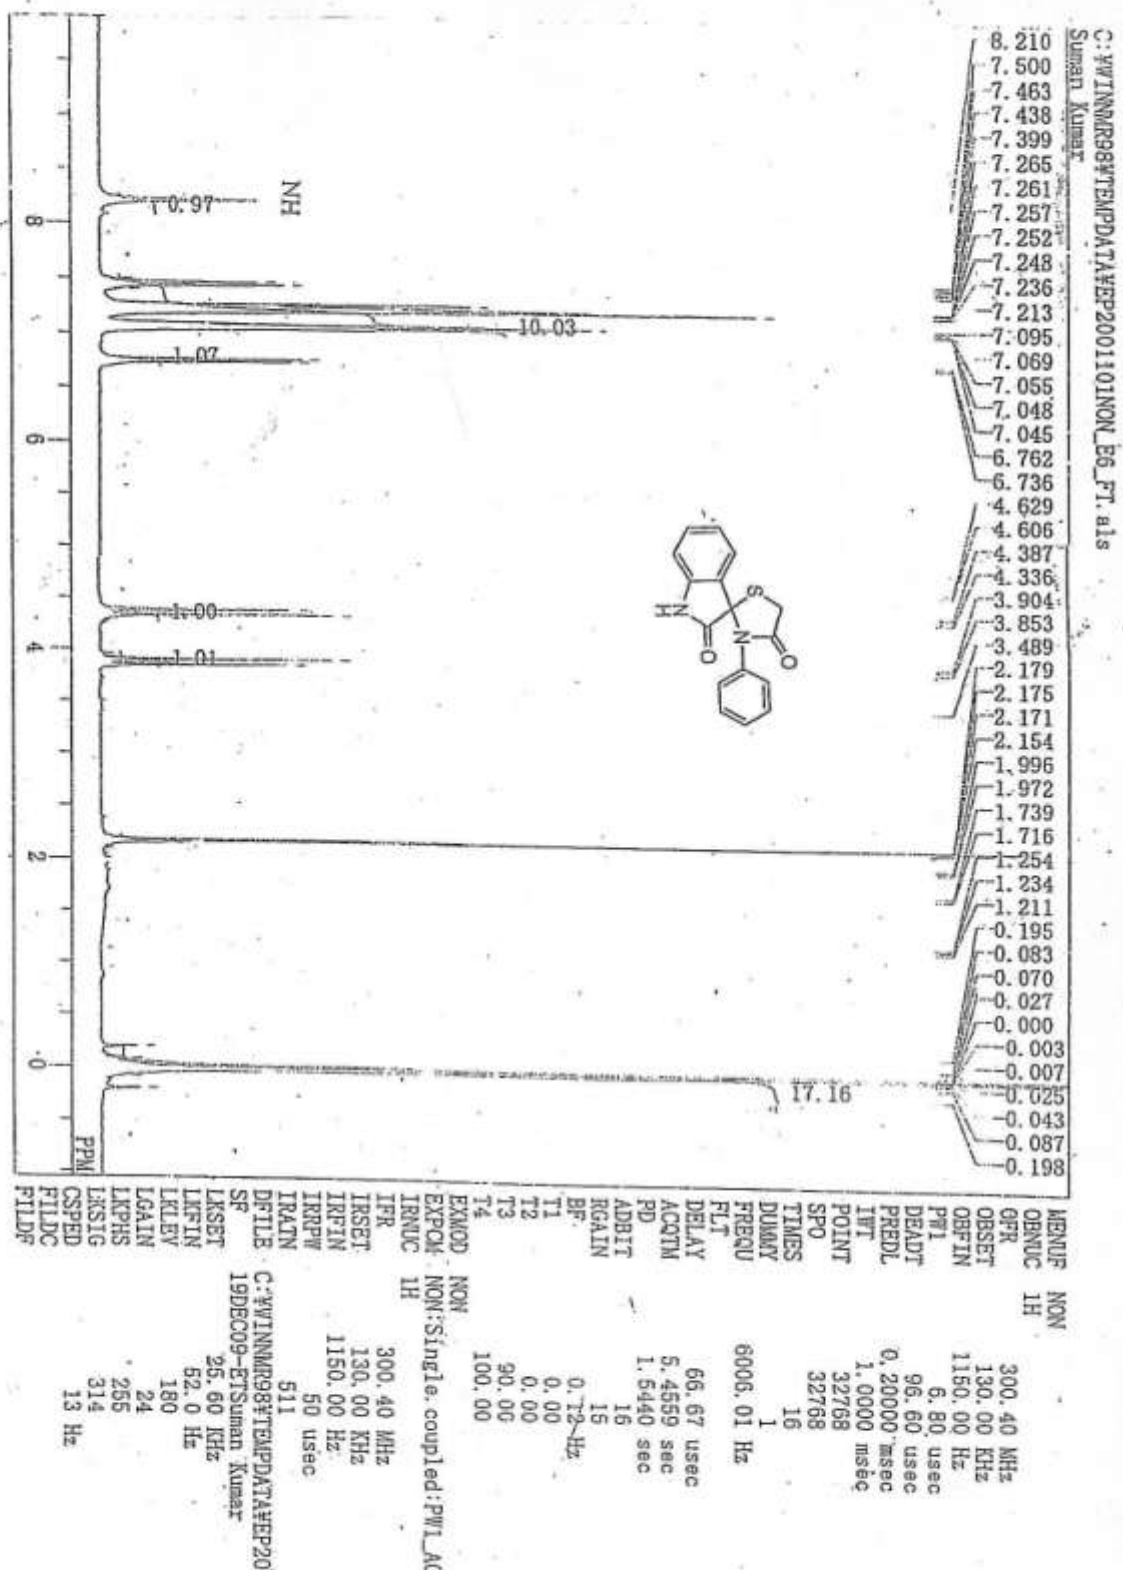



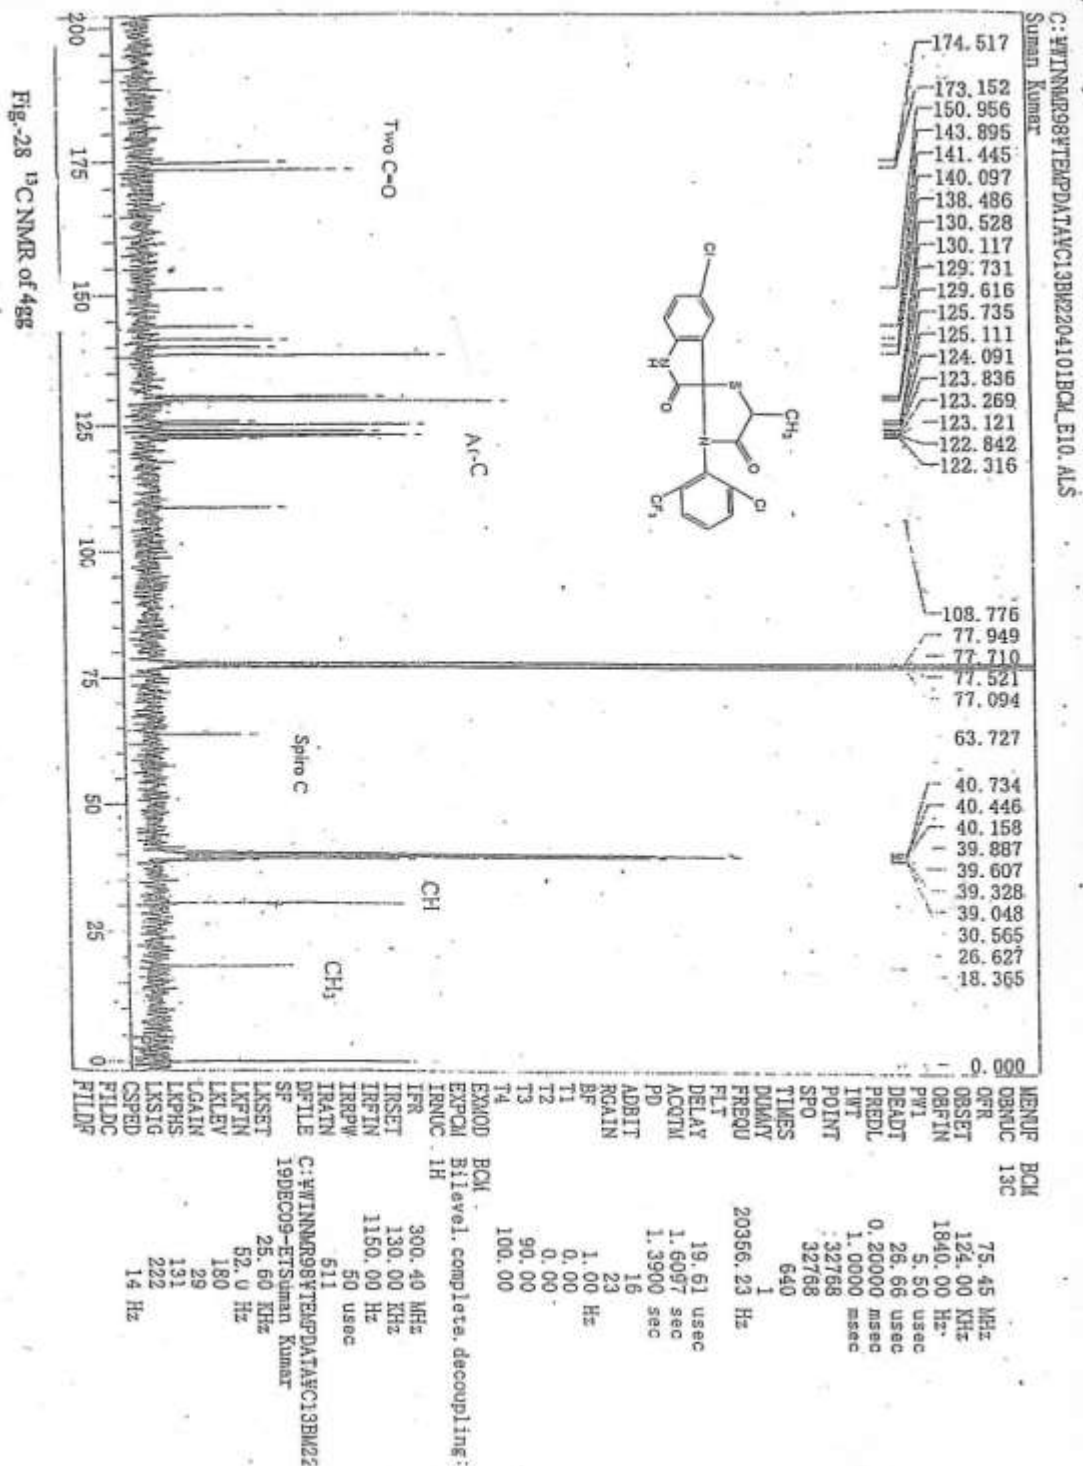

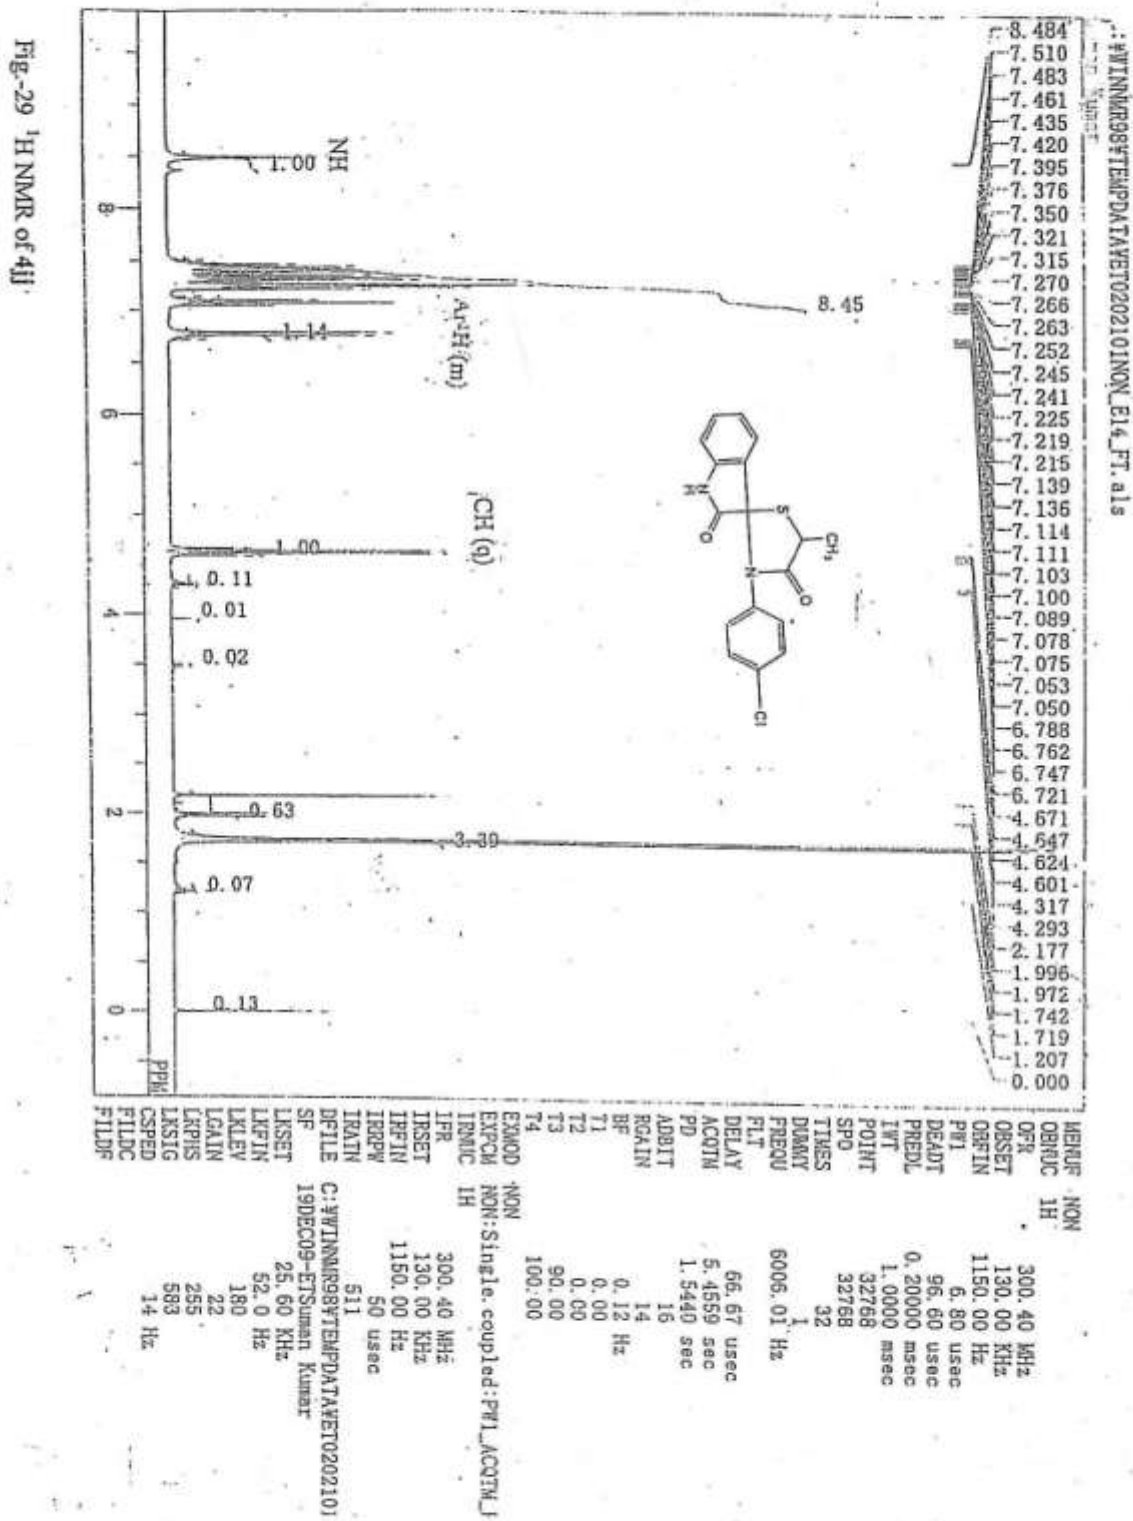

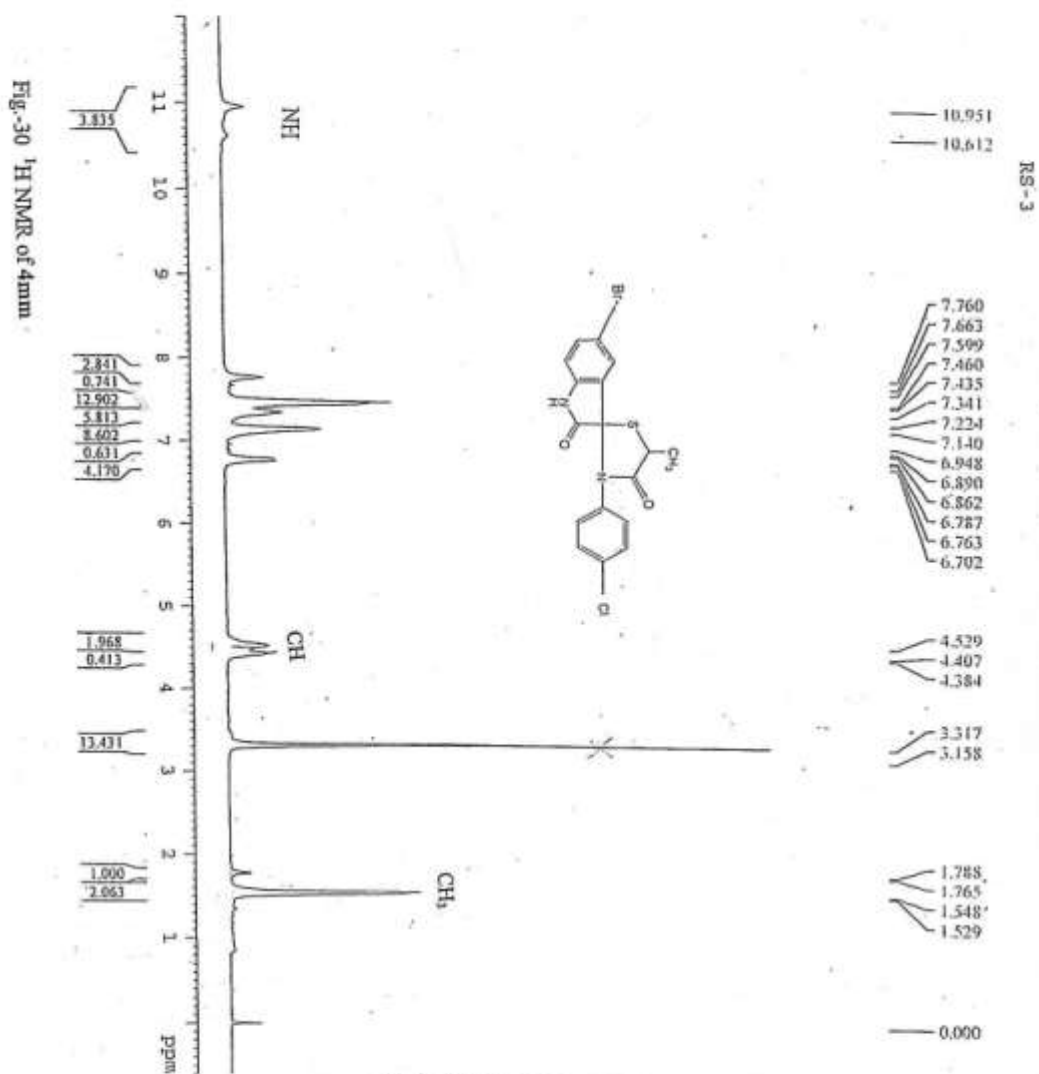

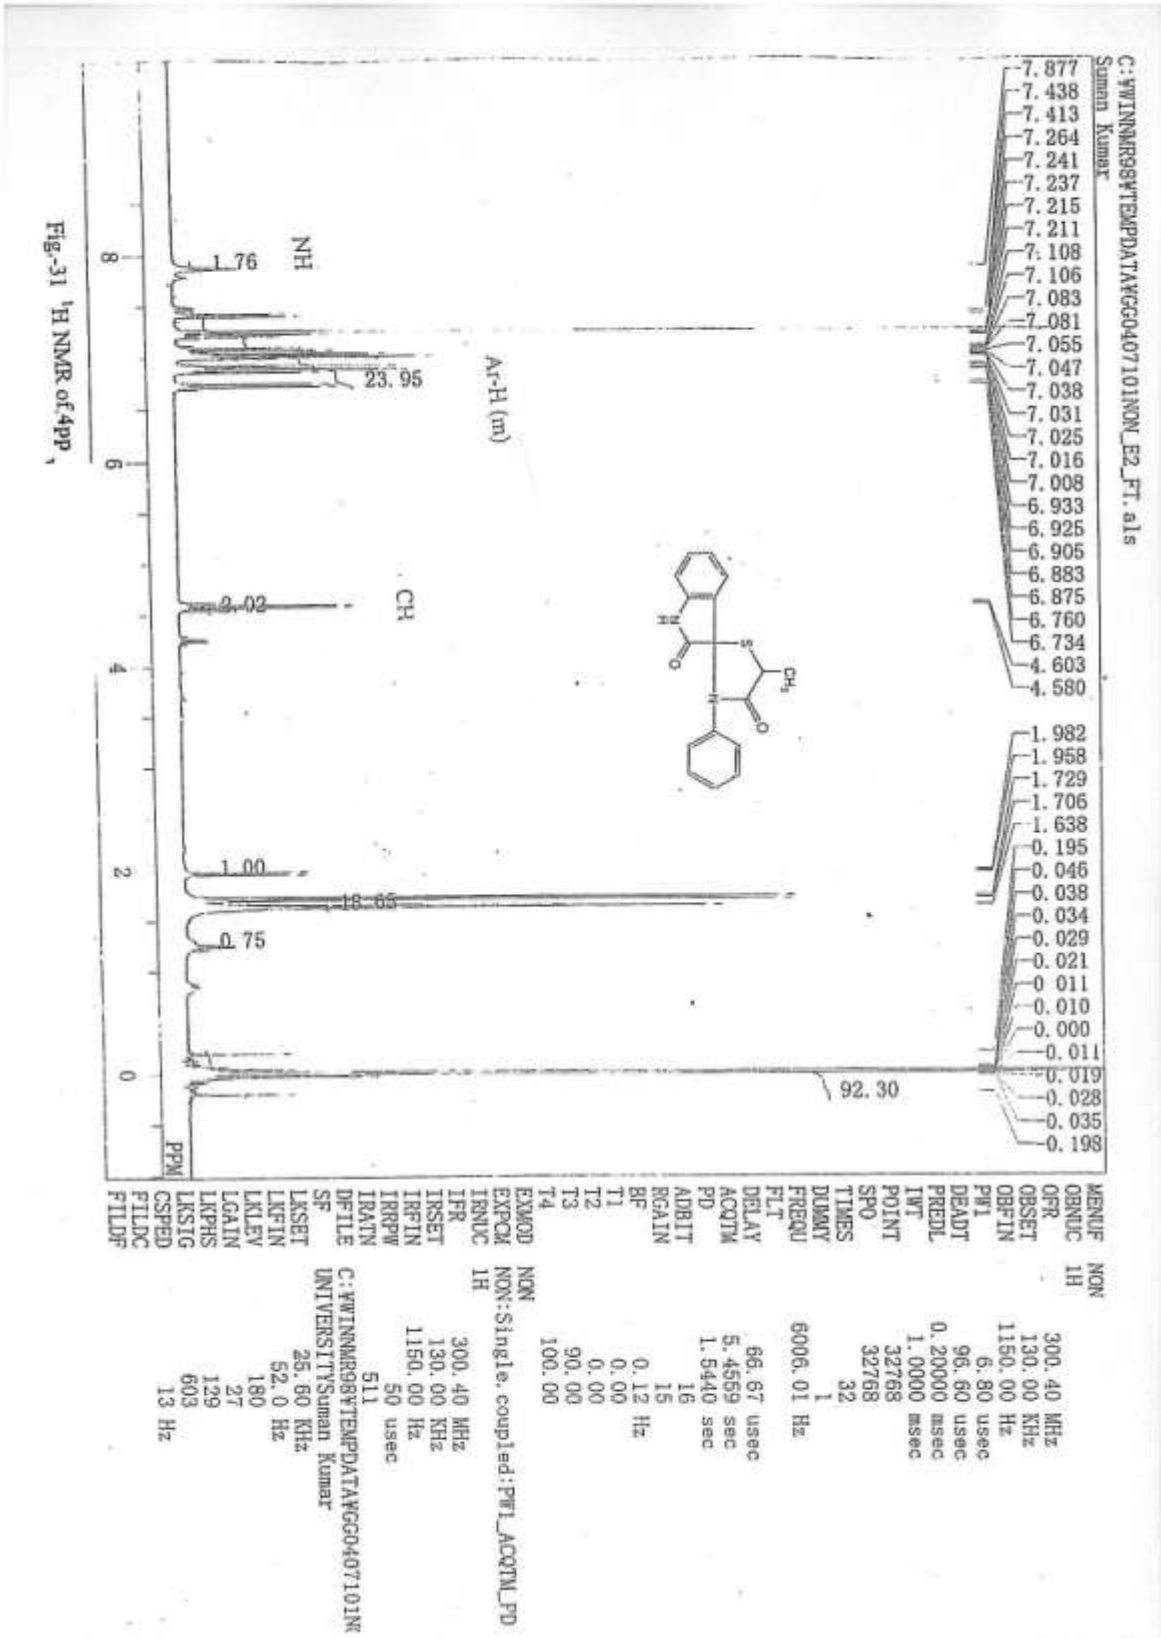

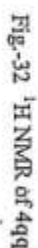



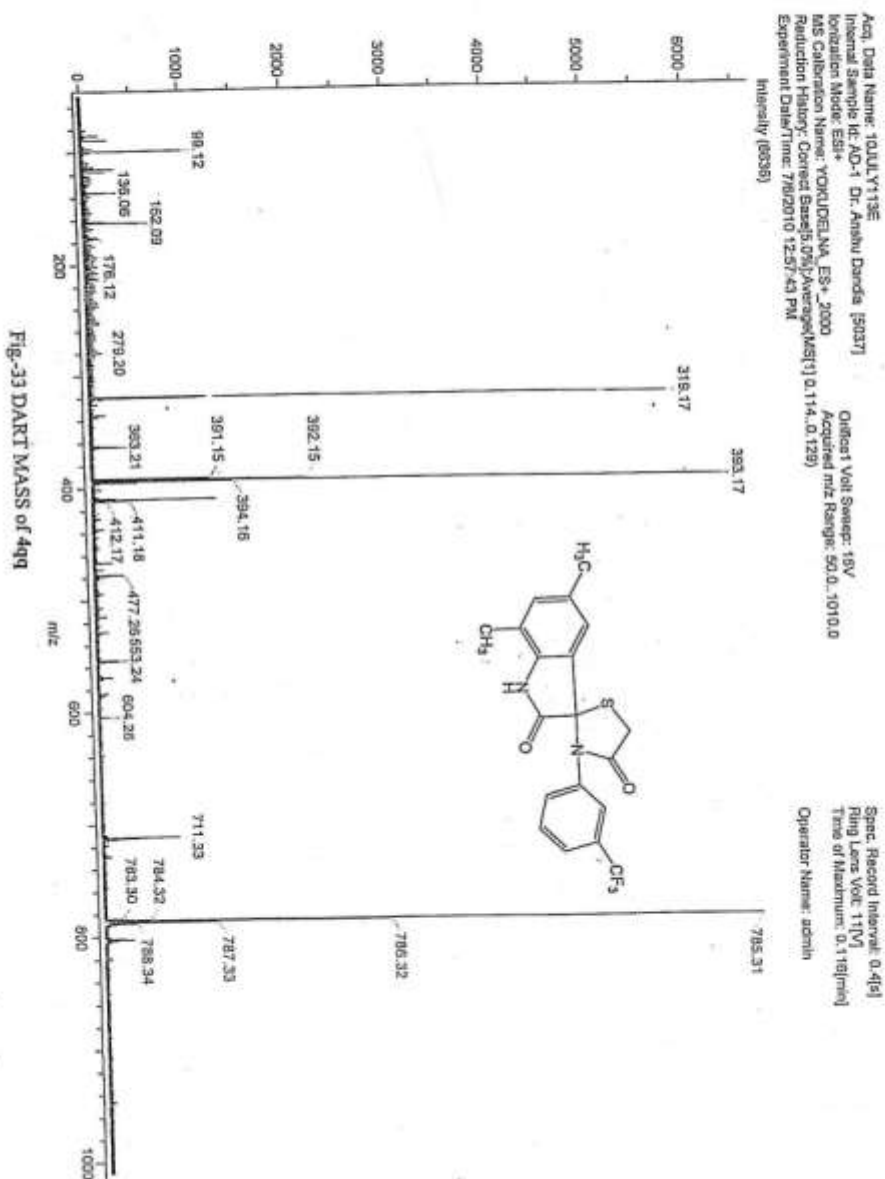

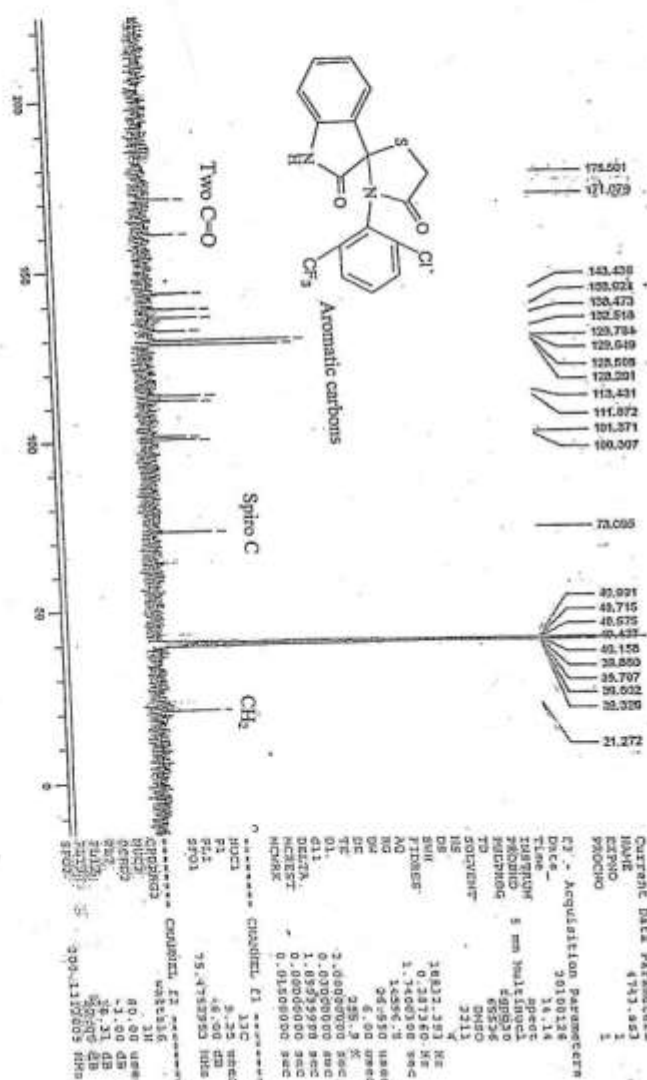



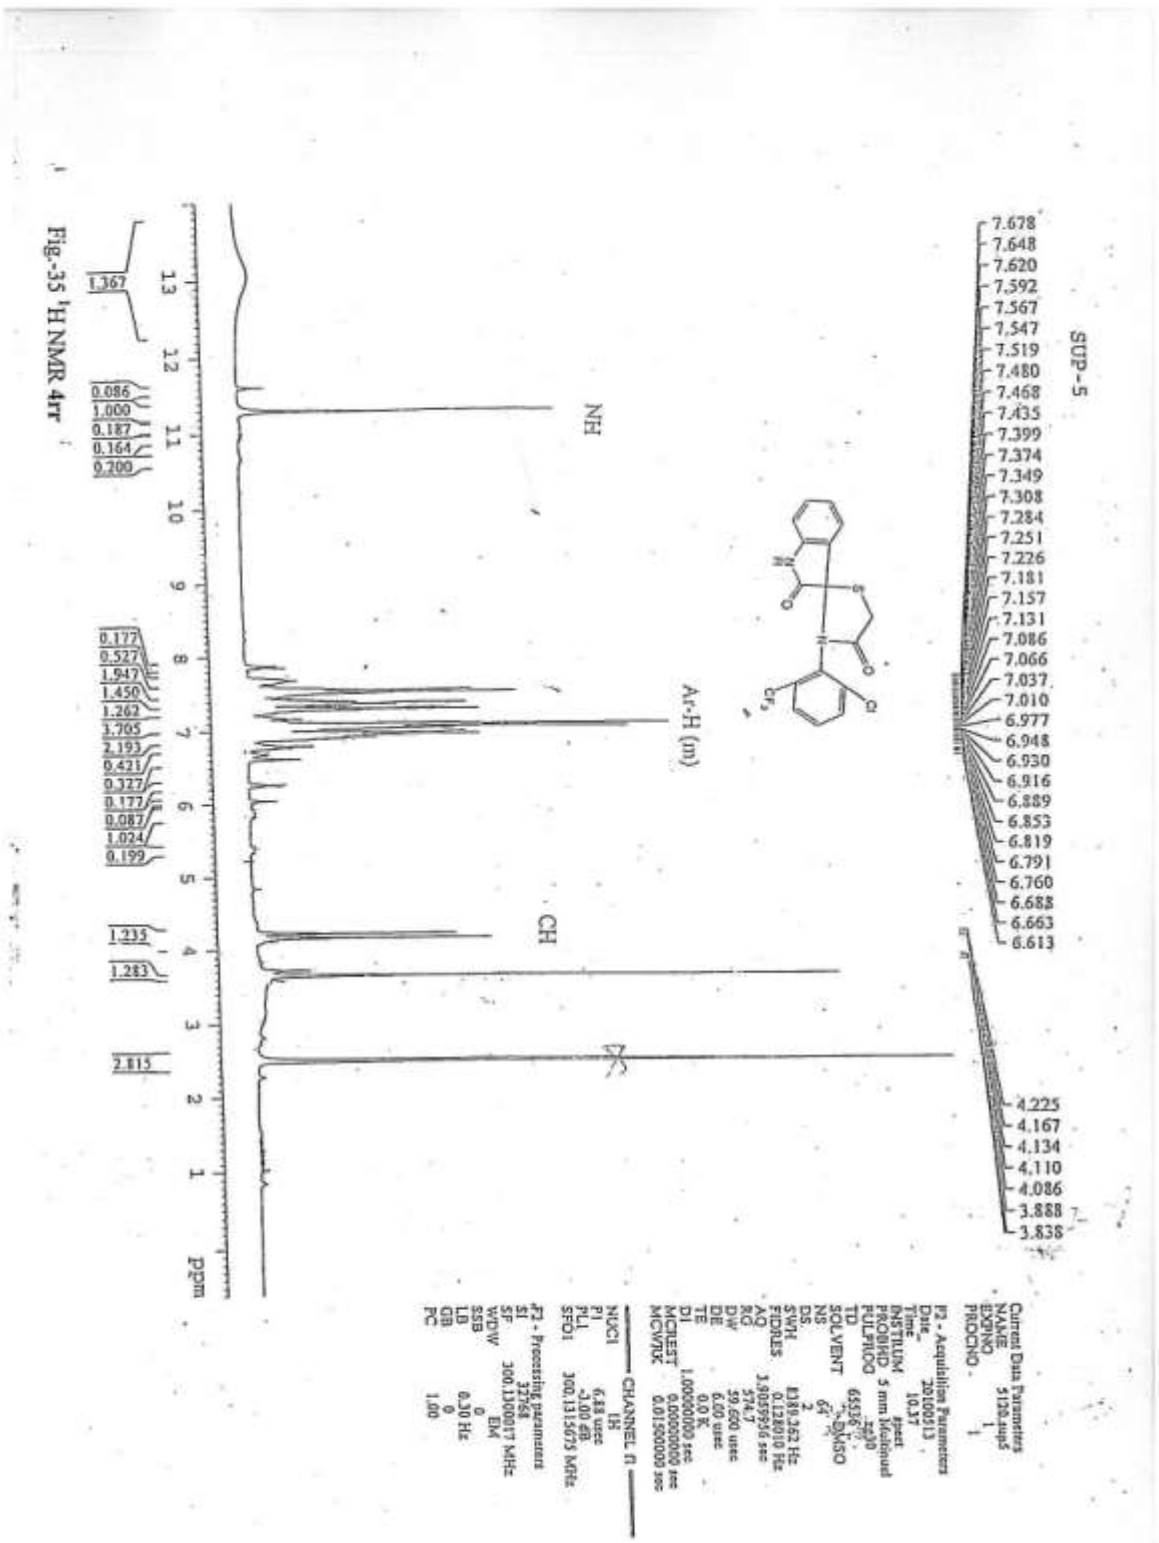

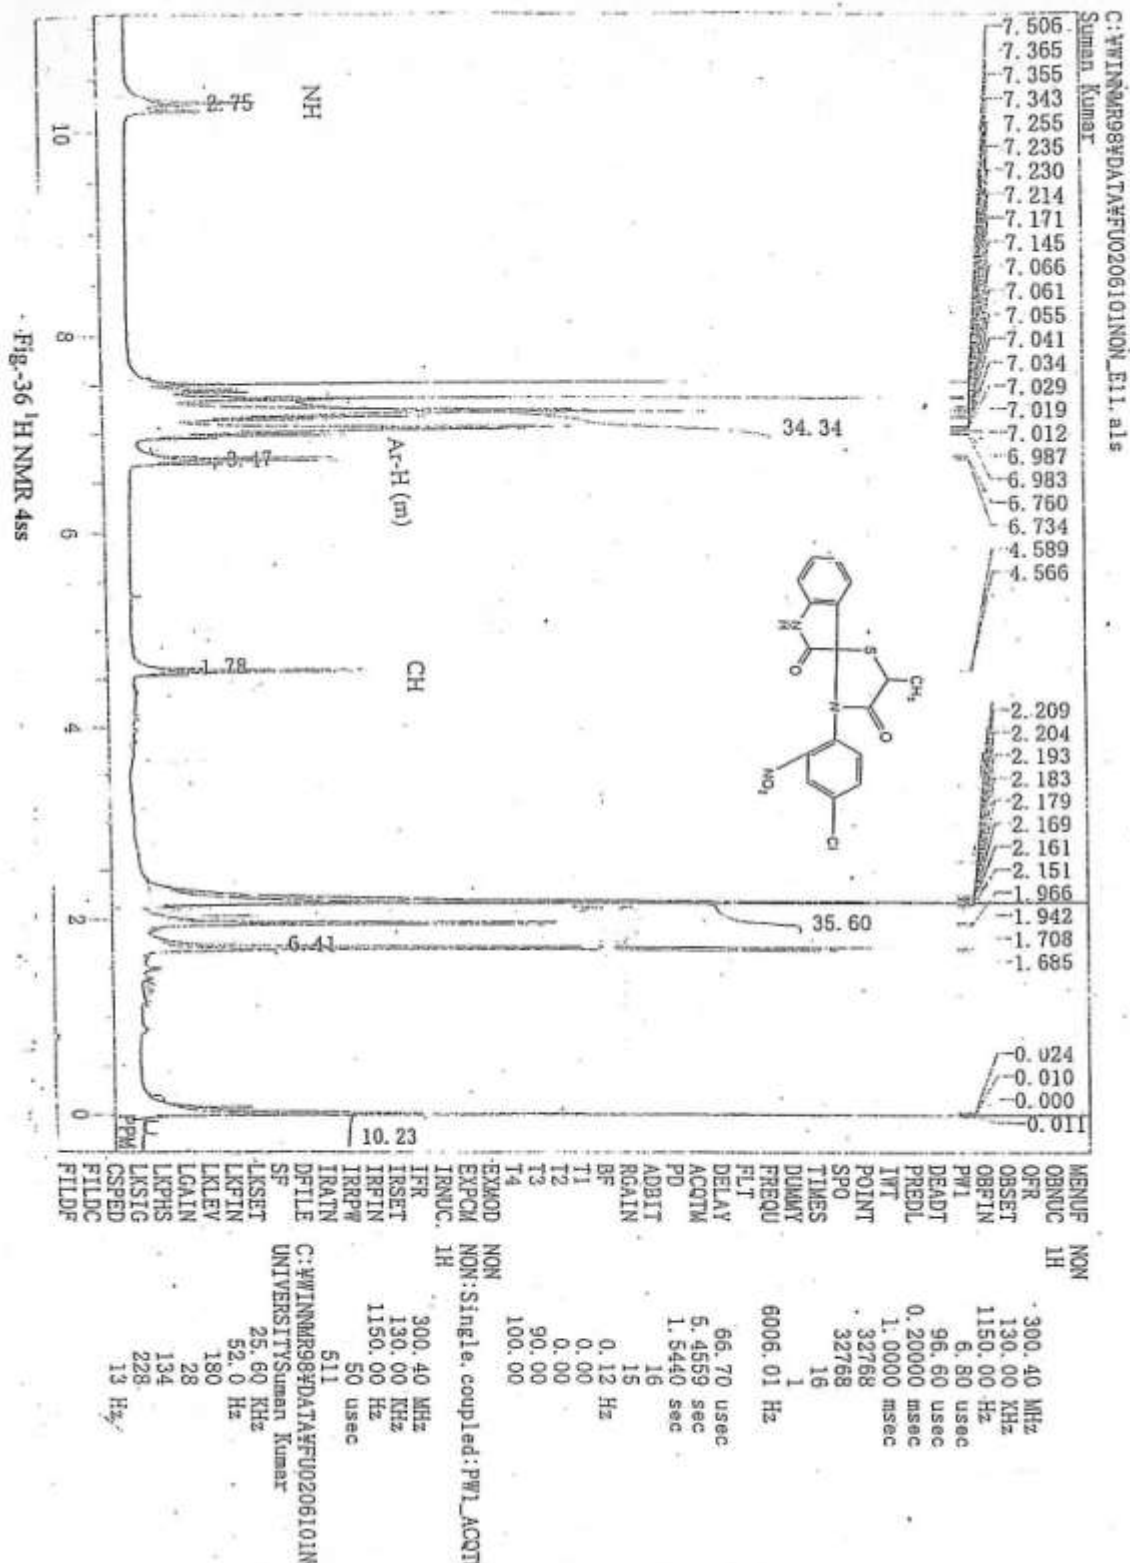

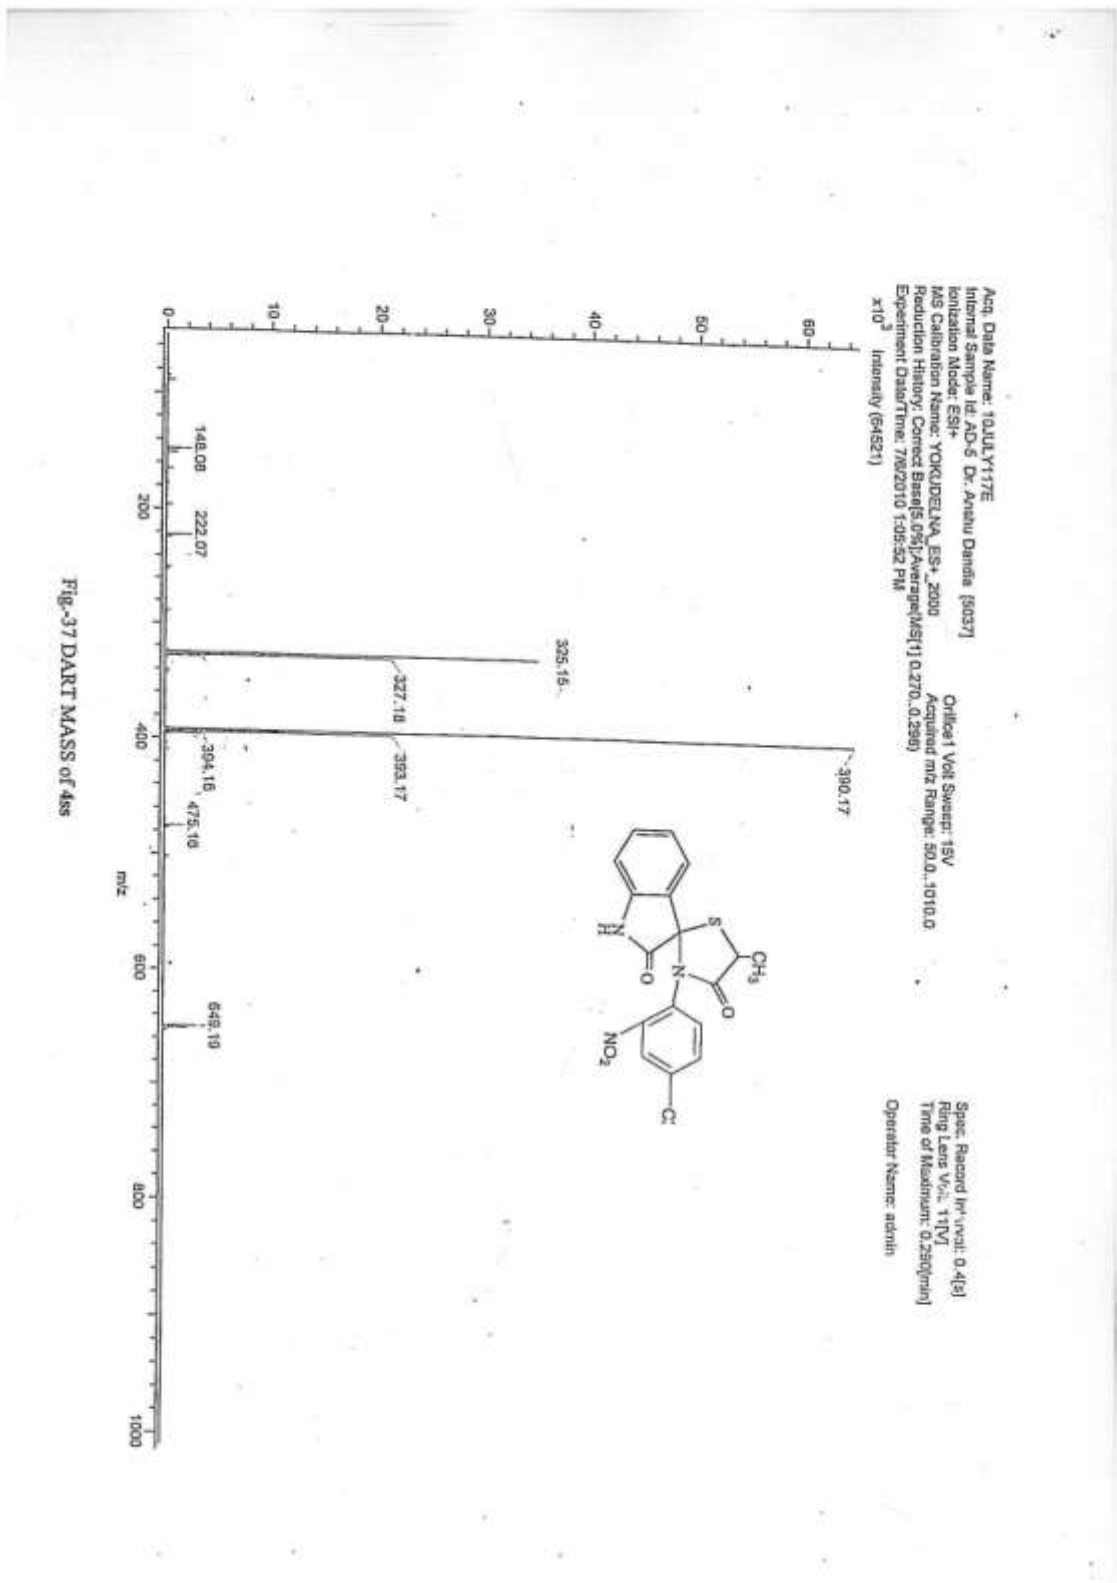

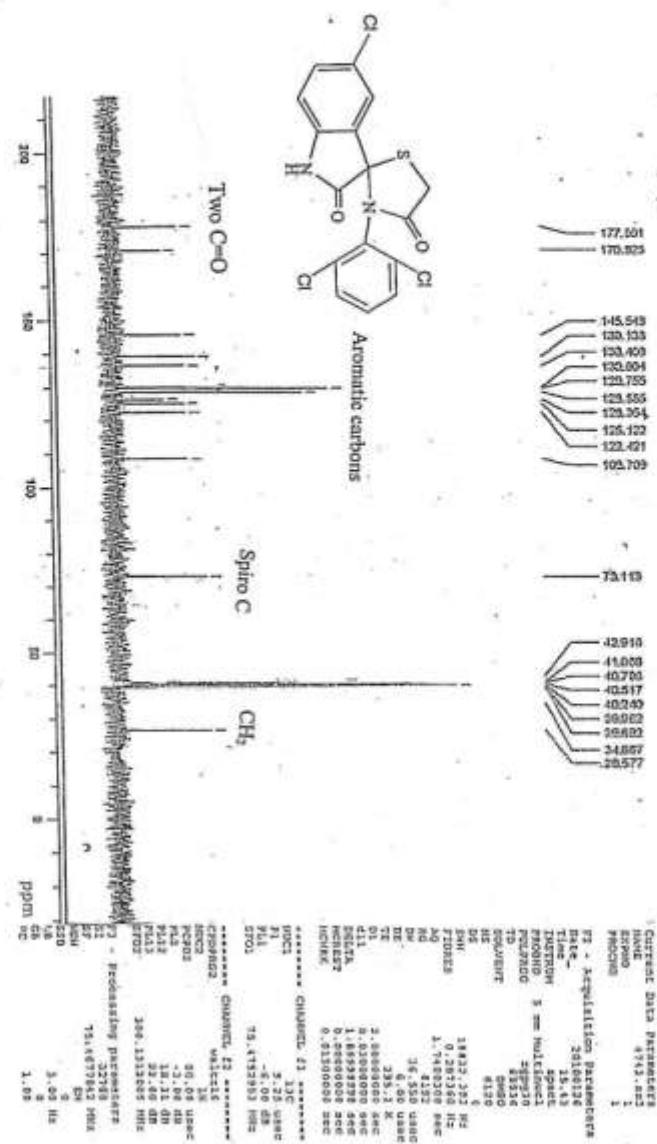

Fig-38 <sup>13</sup>C NMR 4H

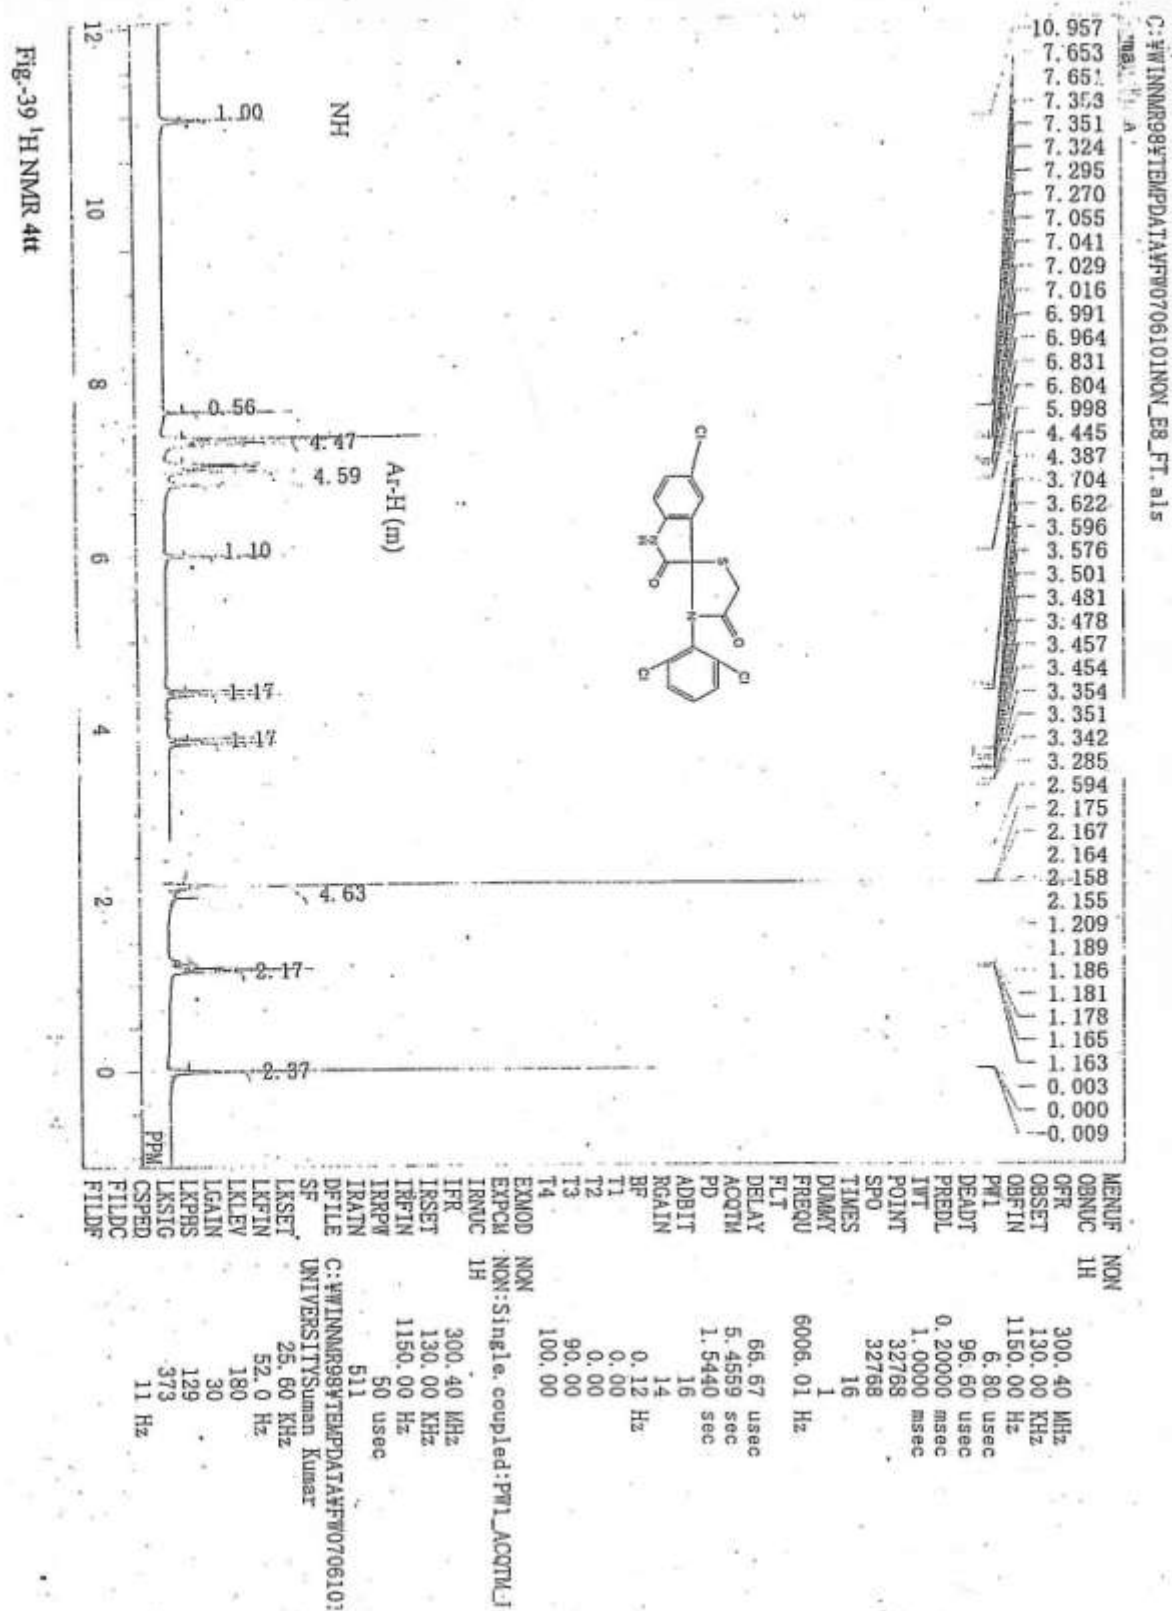

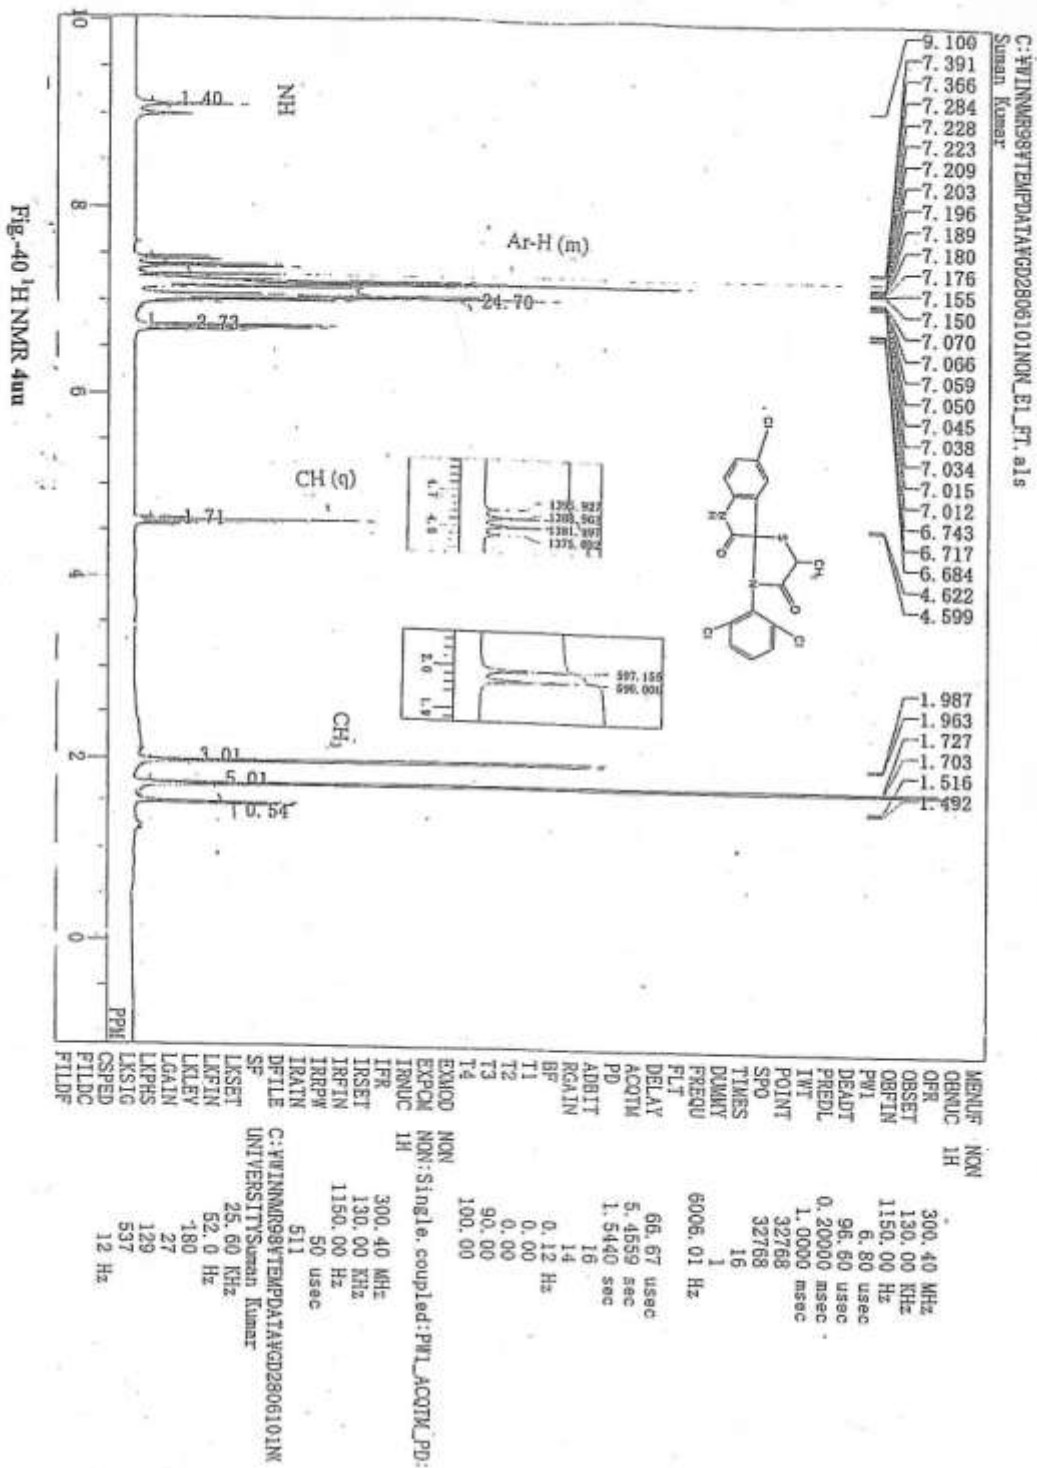



Fig.-41  $^{13}\text{C}$  NMR 4uu

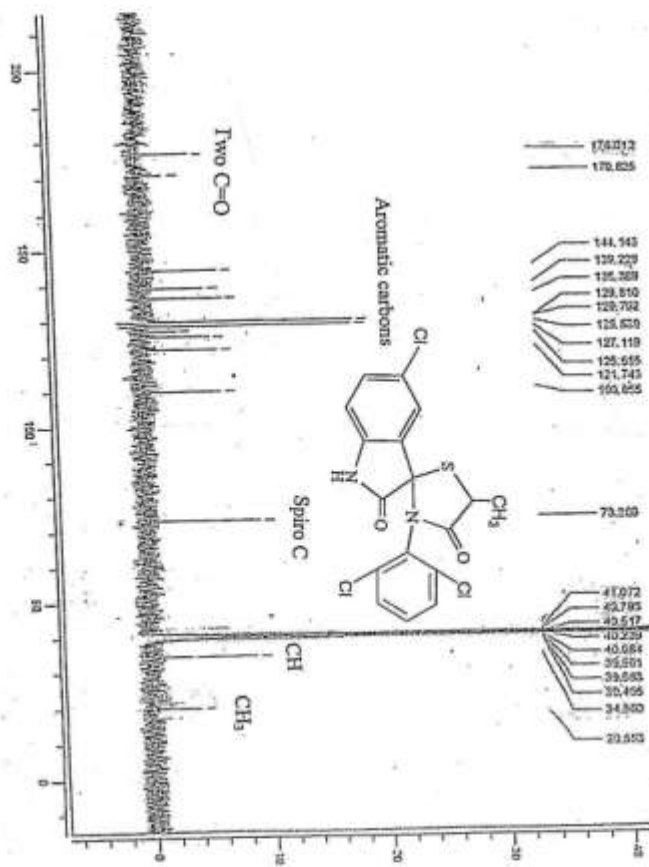

Supplement: c0gc00863j.pdf [file c0gc00863j.pdf]
